# Impact of suppression of tumorigenicity 14 (ST14)/serine protease 14 (Prss14) expression analysis on the prognosis and management of estrogen receptor negative breast cancer

Sauryang Kim<sup>1</sup>, Jae Woong Yang<sup>1</sup>, Chungo Kim<sup>2</sup>, Moon Gyo Kim<sup>1,3</sup>

<sup>1</sup>Inha University, Department of Biological Sciences, Incheon, Republic of Korea

<sup>2</sup>Department of Life Sciences, Korea University, Seoul, Republic of Korea

<sup>3</sup>Convergent Research Institute for Metabolism and Immunoregulation, Incheon, Republic of Korea

**Correspondence to:** Moon Gyo Kim, **email:** mgkim@inha.ac.kr

**Keywords:** ST14, Prss14, epithin, breast cancer, epithelial mesenchymal transition (EMT)

**Received:** January 18, 2016

**Accepted:** April 16, 2016

**Published:** May 04, 2016

## ABSTRACT

To elucidate the role of a type II transmembrane serine protease, ST14/Prss14, during breast cancer progression, we utilized publically accessible databases including TCGA, GEO, NCI-60, and CCLE. Survival of breast cancer patients with high ST14/Prss14 expression is significantly poor in estrogen receptor (ER) negative populations regardless of the ratios of ST14/Prss14 to its inhibitors, SPINT1 or SPINT2. In a clustering of 1085 selected EMT signature genes, ST14/Prss14 is located in the same cluster with CDH3, and closer to post-EMT markers, CDH2, VIM, and FN1 than to the pre-EMT marker, CDH1. Coexpression analyses of known ST14/Prss14 substrates and transcription factors revealed context dependent action. In cell lines, paradoxically, ST14/Prss14 expression is higher in the ER positive group and located closer to CDH1 in clustering. This apparent contradiction is not likely due to ST14/Prss14 expression in a cancer microenvironment, nor due to negative regulation by ER. Genes consistently coexpressed with ST14/Prss14 include transcription factors, ELF5, GRHL1, VGLL1, suggesting currently unknown mechanisms for regulation. Here, we report that ST14/Prss14 is an emerging therapeutic target for breast cancer where HER2 is not applicable. In addition we suggest that careful conclusions should be drawn not exclusively from the cell line studies for target development.

## INTRODUCTION

Type II transmembrane serine proteases are a family of proteases that play physiological roles including embryo development and maintenance of homeostasis [1, 2]. A representative member is protease serine 14 (Prss14), originally called Epithin when it was cloned from thymic epithelium [3]. It has been also called as matriptase [4], membrane type serine protease 1 (MT-SP1) [5], and suppression of tumorigenicity 14 (ST14) [6]. We will use ST14/Prss14 as the name hereafter.

ST14/Prss14 is a protease normally on the cell surface with processing at the Gly 149 residue during biogenesis [7]. The N terminal fragment containing cytoplasmic, transmembrane domains, and a short ectodomain is linked to the rest of the C-terminal fragment containing CUB, LDLR, and a protease domain. Protease activity of ST14/Prss14 requires cleavage at Arg 614,

presumably by autocatalysis (reviewed in [8–10]). Upon TGFβ induction, the ectodomain is further processed by the TNFα converting enzyme (ADAM17) to be shed from the membrane [11]. Phorbol ester can also induce shedding by regulating ST14/Prss14 binding to filamin, a cytoplasmic actin binding protein [12]. An isoform of ST14/Prss14 missing the LDLRA4 domain is defective in shedding [7]. Shed protein recovered from a thymoma cell line and transfected cells behaves as a proangiogenic factor [13]. In addition, we showed that ST14/Prss14 is necessary and sufficient for epithelial mesenchymal transition (EMT) [14]. It also plays an important role in transendothelial migration of epithelial cancer cells [15] and activated macrophage [16].

There has been increasing attention on the normal and pathological cellular function of ST14/Prss14 (summarized in [8, 17, 18]). Its biological functions largely depend on the diverse substrates, such

as extracellular matrix proteins [19], growth factors including hepatocyte growth factor (HGF) [20], epidermal growth factor receptor (EGFR) [21], adhesion molecules including Mac25 [22] and Tie2 [15], proteases including urokinase plasminogen activator (uPA) [20], prostaticin (PRSS8) [23], matrix metalloprotease 3 (MMP3) [24], and more. Two protease inhibitors, HGF activator inhibitor type 1 and 2 (HAI-1 and HAI-2, gene names, SPINT1 and SPINT2, respectively), are known to bind to the ST14/Prss14 protease domain. Serum factors, steroid hormones, acidic pH and changes in ionic strength in the cellular microenvironments can release the inhibitors from the protease and activate it (reviewed in [9, 10, 18, 25]). It is suggested that ST14/Prss14 may be the most upstream of the protease cascade and can control multiple downstream functions.

Physiological functions of ST14/Prss14 are revealed by genetically modified mouse models [17, 26–29] and genetic mutations observed in human populations with a rare skin phenotype [30]. ST14/Prss14 primarily functions in epithelial tissues including skin and thymus. When regulated by the inhibitors or by overexpression, most phenotypes appear as forms of malignant tumors in epithelial tissues [31]. For example, skin-specific overexpression of ST14/Prss14 under Keratin 5 promoter in mouse induced spontaneous skin hyperplasia advanced further into squamous cell carcinoma [26]. Recently, its role in accumulation of inflammation was reported [28]. By using multi-transgenic crosses to manipulate expression of ST14/Prss14 and its inhibitor SPINT2, Thomas Bugge's group showed that ST14/Prss14 can initiate tumorigenesis by causing tumor-associated inflammation.

Genetic profiling, such as a gene expression array analysis, revealed that overexpression of ST14/Prss14 was frequently found in advanced epithelial cancers [32–34]. However, as the name suggests, 'suppression' of tumors by ST14/Prss14 was claimed based on the observation that the expression is reduced in colon cancer [6]. Indeed, a study using systemic expression profiling and immunohistochemistry (IHC) showed that its expression is lower in advanced ovarian cancers [35]. Thus, it is confusing to determine whether ST14/Prss14 has pro- or anti-carcinogenic activity. It appears that sample sizes, tissue types, and context with microenvironments influence the outcome of the results. Furthermore, variations in expression of its cognate inhibitors, SPINT1 and SPINT2, seem to add another level of complexity [36, 37]. Therefore, careful detailed analyses on expression profiling are necessary to clarify the role of the ST14/Prss14 in specific cases.

Systemic expression profiling using cancer patients' tissue samples brought exciting new windows for selecting prognosis markers and therapeutic targets. For the breast cancers especially, genetic profiling analysis opened a new way to classify cancer types. For a good example, breast

cancers can be divided into four different types through the Cancer Genome Atlas (TCGA) study, based on the expression of three important marker genes, estrogen receptor (ER), human EGF receptor 2 (HER-2) and progesterone receptor (PR) [38, 39]. Four breast cancer subtypes are luminal A (ER<sup>+</sup>, PR<sup>+/-</sup>, HER-2<sup>-</sup>), luminal B (ER<sup>+</sup>, PR<sup>+/-</sup>, HER-2<sup>+</sup>), HER-2-enrich (ER<sup>-</sup>, PR<sup>-</sup>, HER-2<sup>+</sup>), and basal-like (ER<sup>-</sup>, PR<sup>-</sup>, HER-2<sup>-</sup>), triple negative (TN).

Another important parameter derived from the expression profiling is the signature genes of epithelial-to-mesenchymal transition (EMT). EMT is an event that involves massive gene expression changes, resulting in switches from one type of more epithelial into the other type of more mesenchymal shape and characteristics (reviews in [40, 41]). After EMT, cancer cells acquire abilities of penetrating basement membranes and blood vessels, and of moving to distant sites. As a result, another focus of cancer cells can settle and grow as secondary tumors. Data on EMT signature genes are being accumulated from studies using model cancer cell lines in defined conditions [42–44]. For example, during EMT progression, E-cadherin (CDH1) expression decreases, vimentin (VIM) expression increases transiently, while N-cadherin (CDH2) and fibronectin (FN1) expression increase [45]. However, detail mechanisms remain as questions at this time point as to how EMT proceeds and which transcription factors govern the particular signal pathways, making it difficult to connect the whole picture.

In this study, we attempted to clarify the role of ST14/Prss14 in breast cancer progression and patients' survival using public databases of gene expression profiles. Through the analyses, we suggest that ST14/Prss14 is an excellent prognosis marker and therapeutic target for ER<sup>-</sup>/TN breast cancers. We also propose yet-to-be-identified modes of action for ST14/Prss14 during EMT.

## RESULTS

### ST14/Prss14 is a superior prognosis marker for ER negative breast cancer

Previously, we reported that ST14/Prss14 can enhance metastasis in a mouse breast cancer model [15]. To investigate whether the conclusion drawn from the mouse study is valid in human breast cancer patient population, we searched ST14/Prss14 expression by using a well-documented TCGA BRCA database. We first examined survival rates of breast carcinoma patients grouped according to ST14/Prss14 expression levels with assignment of "high" and "low" (relatively higher or lower than the average of the whole data points, respectively) and calculated hazard ratio (HR) for each group by using the Mantel-Haenszel method. The ST14/Prss14<sup>high</sup> group show poorer survival than the ST14/Prss14<sup>low</sup> group (high vs. low, HR: 1.605, Figure 1A). In comparison, survival

curves of high and low groups of HER2, a target of the blockbuster antibody drug Herceptin, were between ST14/Prss14<sup>high</sup> and the ST14/Prss14<sup>low</sup>. When survival curves were examined by separating groups sequentially, first by HER2 levels, and then by ST14/Prss14 levels, differences in the survival profile became clearer. Among the HER2<sup>low</sup> groups, ST14/Prss14<sup>high</sup> group showed the poorest survival, while the ST14/Prss14<sup>low</sup> group showed the greatest survival (HER2<sup>low</sup>/ST14/Prss14<sup>high</sup> vs. HER2<sup>low</sup>/ST14/Prss14<sup>low</sup>, HR: 4.064,  $P < 0.01$ , Figure 1B). Among the HER2<sup>high</sup> groups, the ST14/Prss14<sup>low</sup> group showed poorer survival than the ST14/Prss14<sup>high</sup> group (HER2<sup>high</sup>/ST14/Prss14<sup>high</sup> vs. HER2<sup>high</sup>/ST14/Prss14<sup>low</sup>, HR: 0.473).

Next, we wondered whether ST14/Prss14 expression shows any degree of correlation with the stages of TCGA breast cancer used in this analysis (Table 1). The

patients in advanced cancer stages III–IV showed poorer survival relative than the patients in the earlier stage I–II (Figure 1C). Although the average of ST14/Prss14 expression did not appear to be significantly different in two stage groups (Figure 1D), the ST14/Prss14<sup>high</sup> subgroup at stage III–IV showed the poorest survival (III–IV/ST14/Prss14<sup>high</sup> vs. III–IV/ST14/Prss14<sup>low</sup>, HR: 1.350,  $P > 0.05$ , Figure 1E).

We attempted to analyze ST14/Prss14 expression status with known molecular markers that could separate breast cancers into subgroups. Among the three molecular markers, ER, PR and HER2, as shown in Figure 1F, ER status affected the survival (low vs. high, HR: 4.365,  $P < 0.01$ ). Interestingly, the level of ST14/Prss14 expression was significantly higher in the ER<sup>-</sup> group than in the ER<sup>+</sup> group (ER<sup>-</sup> vs. ER<sup>+</sup>,  $P < 0.0001$ ,

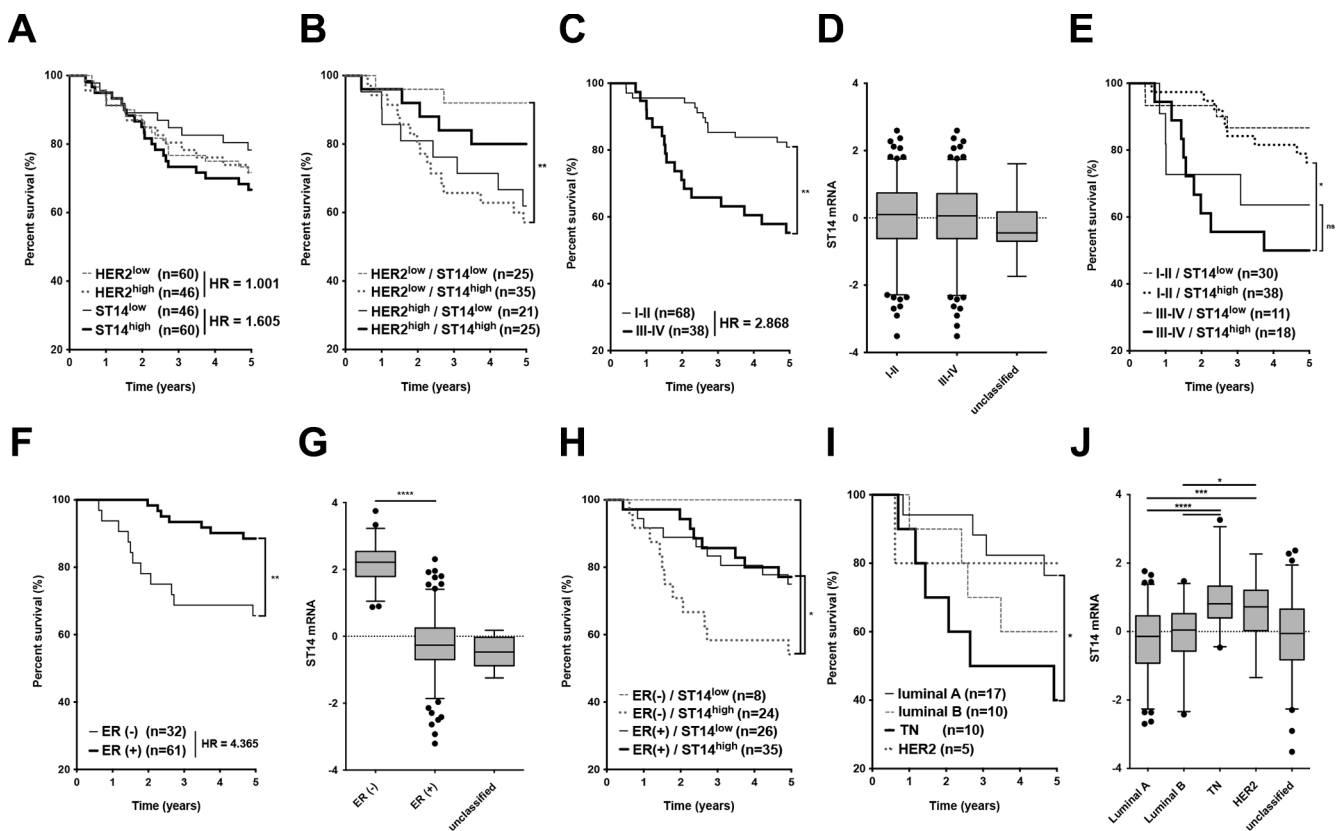

**Figure 1: Analysis of survival and ST14/Prss14 expression in the TCGA BRCA dataset.** (A) Kaplan-Meier survival curves for the high and the low expression groups of ST14/PRSS14 and HER2. Each group was separated by the mean expressions of ST14/Prss14 and of HER2. The Hazard Ratio (HR) is shown in the figure. (B) Four groups were divided first by the highs and the lows of HER2 expression and next by the highs and the lows of ST14/Prss14 expression. (C) An analysis of survival by cancer stages I–II and III–IV. The Hazard Ratio (HR) is shown in the figure. (D) Box plots of ST14/Prss14 expression by cancer stages I–II and III–IV. (E) Kaplan-Meier survival curves of four groups first by cancer stages I–II and III–IV and second by the expressions of ST14/Prss14. (F) Survival by ER expression status. Kaplan-Meier survival curves of two groups by ER status determined by IHC. The Hazard Ratio (HR) is shown in the figure. (G) Box plots of ST14/Prss14 expression by ER status. Mean Difference of ER<sup>-</sup> vs. ER<sup>+</sup> 2.440. (H) Kaplan-Meier survival curves of four groups separating first by ER status and next by ST14/Prss14 expression. (I) Kaplan-Meier survival curves of four groups by breast cancer subtypes. (J) Box plots of ST14/Prss14 expression by breast cancer subtypes. Mean Difference, TN vs. luminal A: 1.075, TN vs. luminal B: 0.935, TN vs. HER2: 0.240. In box plots, the median was plotted as a line in the middle of the gray box. The whiskers were drawn down to the 2.5 percentiles and up to the 97.5 percentiles. Points below and above the whiskers were outlier dots. A one-way ANOVA was calculated between groups and  $P$  values were determined by Sidak's multiple comparisons test. \* $P < 0.05$ , \*\* $P < 0.01$ , \*\*\* $P < 0.001$ , \*\*\*\* $P < 0.0001$ .

**Table 1: TCGA BRCA patient cohorts by ER expression status and cancer subtypes**

| Characteristics      | ER status      |                |                |                | Breast cancer subtypes |                |                 |                |                |  |
|----------------------|----------------|----------------|----------------|----------------|------------------------|----------------|-----------------|----------------|----------------|--|
|                      | whole cohort   | negative       | positive       | un-classified  | luminal A              | luminal B      | triple negative | HER2-enriched  | un-classified  |  |
|                      | <i>n</i> = 464 | <i>n</i> = 109 | <i>n</i> = 350 | <i>n</i> = 5   | <i>n</i> = 190         | <i>n</i> = 62  | <i>n</i> = 51   | <i>n</i> = 22  | <i>n</i> = 139 |  |
| mean age (SD, range) | 58 (13, 26–90) | 54 (13, 26–82) | 60 (13, 27–90) | 55 (16, 44–80) | 60 (13, 29–89)         | 61 (14, 29–88) | 52 (12, 29–82)  | 59 (13, 34–80) | 57 (13, 26–90) |  |
| <b>tumor stage</b>   |                |                |                |                |                        |                |                 |                |                |  |
| I–II (%)             | 334 (74.7)     | 82 (75.2)      | 249 (71.1)     | 3 (60)         | 137 (72.1)             | 45 (72.6)      | 42 (82.4)       | 15 (68.2)      | 95 (68.3)      |  |
| III–IV (%)           | 113 (25.3)     | 23 (21.1)      | 89 (25.4)      | 1 (20)         | 48 (25.3)              | 16 (25.8)      | 7 (13.7)        | 7 (31.8)       | 35 (25.2)      |  |
| Unclassified (%)     | 17 (3.8)       | 4 (3.7)        | 12 (3.4)       | 1 (20)         | 5 (2.6)                | 1 (1.6)        | 2 (3.9)         | 0 (0)          | 9 (6.5)        |  |

ER status and breast cancer subtypes of 464 TCGA BRCA patients were classified by ER, PR, and HER2 expression determined by the IHC technique. Their tumor stages were derived from the clinical data provided.

Figure 1G). Particularly, ST14/Prss14<sup>high</sup> in ER<sup>-</sup> showed the worst outcome, while ST14/Prss14<sup>low</sup> in ER<sup>-</sup> showed the best (ER<sup>-</sup>/ST14/Prss14<sup>high</sup> vs. ER<sup>-</sup>/ST14/Prss14<sup>low</sup>, HR: 4.213, *P* < 0.05 Figure 1H). Among the groups of patients divided into four subtypes, triple negative (TN) breast cancer which was negative for these three receptors resulted in the lowest survival rate (Figure 1I) and the expression level of ST14/Prss14 was the highest (TN vs. luminal A, *P* < 0.001, TN vs. luminal B, *P* < 0.0001, TN vs. HER2, *P* > 0.05, Figure 1J).

In order to examine whether the poor survival is due to high ST14/Prss14 expression, and not due to the absence of HER2 in TN, we tried to compare the survival of ST14/Prss14<sup>high</sup> and ST14/Prss14<sup>low</sup> populations in the HER2 and TN breast cancer groups. Although the numbers of data in the TCGA breast cancer database are extremely low and all TN patients show high ST14/Prss14 expression, the pattern showed poor survival in ST14/Prss14<sup>high</sup> patients regardless of HER2 expression (Figure S1A and S1B). From another data set (GSE20685) derived from Taiwanese studies [46], a similar pattern was observed (Figure S1C and S1D). However, in these analyses, statistical significance was weak or not significant, most likely due to the limiting numbers of data points.

Therefore, these results suggested that ST14/Prss14 is an excellent prognosis marker, especially in ER<sup>-</sup> and TN breast cancers. Moreover, ST14/Prss14 is a highly potential therapeutic target in TN breast cancers when Herceptin is not an option.

### Context dependent ST14/Prss14 expression and function in ER<sup>-</sup> breast cancer patients

Because the increased ratio of ST14/Prss14 to its inhibitor SPINT1 was observed in some carcinomas [36, 37], we examined the ratio of ST14/Prss14 to SPINT1 and SPINT2. While the averages of SPINT1 and SPINT2

expression levels are not different in the cancer stages I–II and III–IV (Figure 2A), SPINT2 expression levels were somewhat lower in ER<sup>-</sup> and TN breast cancer groups (Mean differences of SPINT2, ER<sup>-</sup> vs. ER<sup>+</sup>, *P* < 0.01, TN vs. luminal A, *P* < 0.01, TN vs. luminal B, *P* < 0.01, TN vs. HER2, *P* > 0.5) (Figure 2B and 2C). The ratio of ST14/Prss14 to SPINT1, ratio(I), and that of ST14/Prss14 to SPINT2, ratio(II), showed no big difference among the cancer stages (Figure 2D). However, both ratios were significantly higher in ER<sup>-</sup> (Figure 2E) and TN groups than in others (Figure 2F).

The survival curves examined by these ratios of ST14/Prss14 to inhibitors did not reveal significant differences (Figure 2G). In addition, high and low ratios as well as those in cancer stage III–IV group also did not reveal any significant differences in the survival profiles (Figure 2H). The ratio(II)<sup>high</sup> is somewhat higher in the ER<sup>-</sup> group and showed poorer 5 year survival, however, without statistical significance (Figure 2I). These results suggest that inhibitor expression does not critically contribute to patient's survival, particularly for early years. However, larger number of cases can help to conclude whether the protease/inhibitors ratio contribute to the patient's survival.

Table 2 shows a coexpression pattern of known ST14/Prss14 substrates and their receptors/interacting partners. Genes of coexpression profiles with better significance are CUB domain-containing protein 1 (CDCP1), uPA receptor (PLAUR), EGFR, HGF receptor (MET), and desmoglein-2 (DSG2), a component of laminin 5 (LAMB3). These genes are all well-known not only for EMT but also other cancer processes. Among the negatively associated genes, hepsin (HPN), macrophage stimulating protein (MST1), platelet derived growth factor D (PDGFD), and Tie 2 (TEK) showed a stronger correlation. These results suggest that a subset of ST14/Prss14 substrates is involved in breast cancer progression.

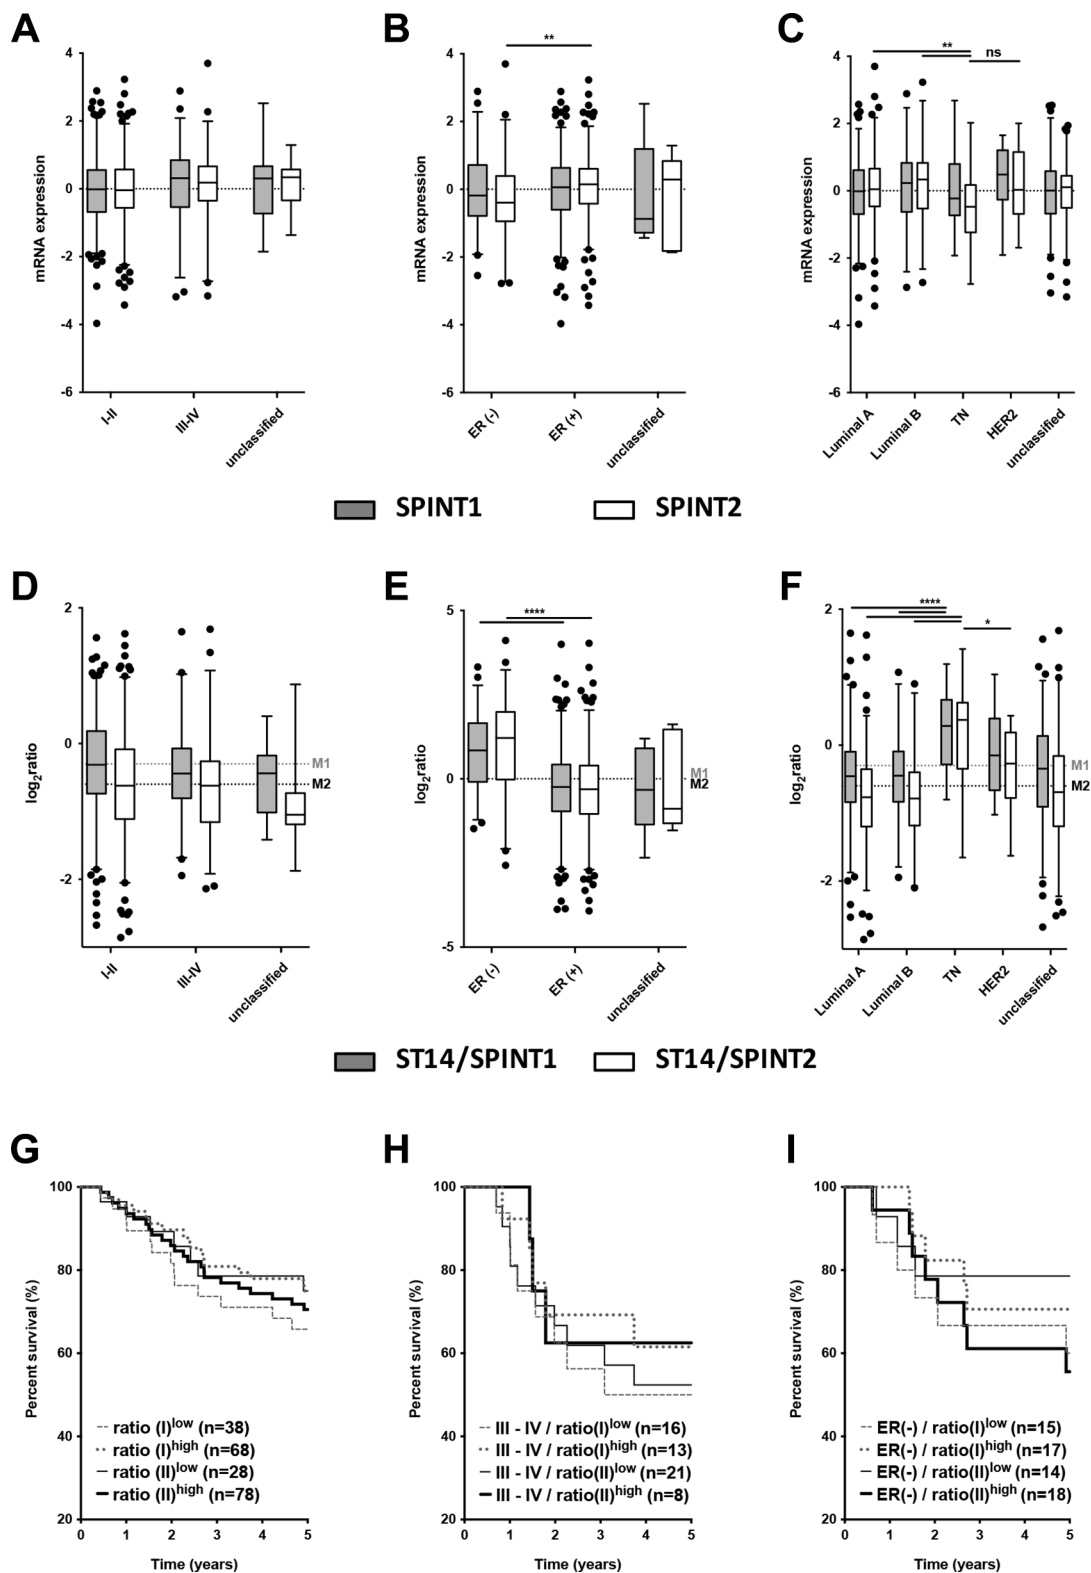

**Figure 2: Analysis of the expression of SPINT1, SPINT2 and ratios of ST14/Prss14 to SPINT1 and SPINT2.** (A–C) Box plots of SPINT1 and SPINT2 expression by cancer stages (I–II, III–IV, and unclassified), by ER expression status (ER<sup>+</sup>, ER<sup>-</sup>, and unclassified), and by breast cancer subtypes (Luminal A, Luminal B, TN, HER2<sup>+</sup>, and unclassified). SPINT1, gray box, SPINT2, white box. (D–F) Ratios of ST14/Prss14 to SPINT1 and to SPINT2 by cancer stages (I–II, III–IV, and unclassified), by ER expression status (ER<sup>+</sup>, ER<sup>-</sup>, and unclassified), and by breast cancer subtypes (Luminal A, Luminal B, TN, HER2<sup>+</sup>, and unclassified). ST14/Prss14 to SPINT1, gray box, ST14/Prss14 to SPINT2, white box, average of ST14/Prss14 to SPINT1, M1, average of ST14/Prss14 to SPINT2, M2. (G–I) Kaplan-Meier survival curves for the ratios of ST14/Prss14 to SPINT1 (I) and to SPINT2 (II) in stages III–IV group, and ER<sup>-</sup> group.

**Table 2: Coexpression of known ST14/Prss14 substrates and their receptors downstream**

| Gene symbol | Alias                               | Description                                               | Correlation with ST14 |         | ER <sup>-</sup> vs. ER <sup>+</sup> |         |
|-------------|-------------------------------------|-----------------------------------------------------------|-----------------------|---------|-------------------------------------|---------|
|             |                                     |                                                           | Pearson r             | P value | Mean Diff.                          | P value |
| ST14        | Matriptase, Epithin, PRSS14, MT-SP1 | Suppression Of Tumorigenicity 14 (Colon Carcinoma)        |                       |         | 0.9469                              | ****    |
| CDCP1       | TRASK, CD318                        | CUB Domain Containing Protein 1                           | 0.4332                | ****    | 0.4074                              | ***     |
| PLAUR       | uPAR                                | Plasminogen Activator, Urokinase Receptor                 | 0.3200                | ****    | 0.7024                              | ****    |
| EGFR        | ERBB1, HER1                         | Epidermal Growth Factor Receptor                          | 0.2893                | ****    | 1.4520                              | ****    |
| MET         | HGFR, C-Met                         | MET Proto-Oncogene, Receptor Tyrosine Kinase              | 0.2187                | ****    | 0.9845                              | ****    |
| DSG2        |                                     | Desmoglein 2                                              | 0.2141                | ****    | 0.6692                              | ****    |
| LAMB3       |                                     | Laminin, Beta 3                                           | 0.2064                | ****    | 0.4717                              | ****    |
| PLAU        | uPA                                 | Plasminogen Activator, Urokinase                          | 0.1719                | ***     | 0.1552                              | ns      |
| PRSS8       | prostasin                           | Protease, Serine, 8                                       | 0.1598                | ***     | -0.3147                             | *       |
| FN1         |                                     | Fibronectin 1                                             | 0.1192                | *       | -0.0952                             | ns      |
| MMP3        |                                     | Matrix Metalloproteinase 3                                | 0.0736                | ns      | 0.2221                              | ns      |
| MMP2        |                                     | Matrix Metalloproteinase 2                                | 0.0627                | ns      | -0.1601                             | ns      |
| PLG         |                                     | Plasminogen                                               | 0.0405                | ns      | 0.1799                              | ns      |
| F2RL1       | PAR2                                | Coagulation Factor II (Thrombin) Receptor-Like 1          | 0.0336                | ns      | 0.0387                              | ns      |
| KDR         | VEGFR2                              | Kinase Insert Domain Receptor                             | 0.0121                | ns      | -0.0700                             | ns      |
| FLG         |                                     | Filaggrin                                                 | -0.0120               | ns      | -0.0148                             | ns      |
| KLKB1       |                                     | Kallikrein B, Plasma (Fletcher Factor) 1                  | -0.1277               | **      | -0.1440                             | ns      |
| HGF         |                                     | Hepatocyte Growth Factor (Hepapoinetin A; Scatter Factor) | -0.1640               | ***     | -0.6772                             | ****    |
| IGFBP7      | Angiomodulin                        | Insulin-Like Growth Factor Binding Protein 7              | -0.1783               | ***     | -0.3749                             | **      |
| TEK         | Tie-2                               | TEK Tyrosine Kinase, Endothelial                          | -0.1995               | ****    | -0.5076                             | ****    |
| MST1        |                                     | Macrophage Stimulating Protein                            | -0.2176               | ****    | -0.6715                             | ****    |
| PDGFD       |                                     | Platelet Derived Growth Factor D                          | -0.2249               | ****    | -0.7368                             | ****    |
| HPN         | TMPRSS1                             | Hepsin                                                    | -0.2561               | ****    | -1.0260                             | ****    |

Genes were analyzed for correlation with ST14/Prss14 and ER expression status, using TCGA BRCA data. Genes were arranged by the degree of correlation values with ST14/Prss14.

\* $P \leq 0.05$ , \*\* $P \leq 0.01$ , \*\*\* $P \leq 0.001$ , \*\*\*\* $P \leq 0.0001$ , ns (not significant).

### Positioning ST14/Prss14 in the cluster of EMT signature genes with breast cancer types

We next positioned ST14/Prss14 in clusters with particular EMT signature genes in breast cancer patients to find clues for the specific role of ST14/Prss14 in the EMT process that we described earlier [14]. Our selection of 1085 EMT signature genes (Table S1) were first clustered according to the cancer stages, using a self-organizing map (SOM) analysis (Figure S2). However, it was difficult to clearly differentiate expression clusters between the two groups of cancer stages (stage I–II or stage III–IV). A clustering pattern did not reveal any satisfying grouping of the known EMT signature genes with the early I–II and the late III–IV stages. Therefore, we used an alternative clustering strategy in which ER expression status of the cancer tissues was taken into consideration (Figure 3). The resulting clusters revealed several differential expressions between the ER<sup>-</sup> and ER<sup>+</sup> groups. Cluster 1, of which expression was low in ER<sup>-</sup> patients, contains the two inhibitors, SPINT1 and

SPINT2. On the contrary, cluster 6 containing genes show the opposite pattern to cluster 1 (high in ER<sup>-</sup>, low in ER<sup>+</sup> patients). Cluster 6 includes ST14/prss14 and P-cadherin (CDH3). While cluster 2 contains CDH1, cluster 3 does not appear to show a distinctive pattern. In contrast, cluster 4 and cluster 5 contain FN1, VIM, and CDH2. Cluster 4 and 5 showed similar patterns to cluster 6 with minor differences. From these results, the role of ST14/Prss14 during the EMT process cannot be easily resolved since it is not co-clustered with any of the stage specific EMT markers, such as CDH1 or CDH2 (see discussion).

Next, to verify the pattern of TCGA BRCA gene clustering, we chose to analyze another breast cancer dataset from the Gene Expression Omnibus (GEO) database GSE20685. For comparison with the TCGA BRCA dataset, we named the cluster containing genes that are expressed in the higher level in ER<sup>-</sup> than that in ER<sup>+</sup> breast cancer cells as Higher Cluster in Patients (HCP). Similarly, for the other cluster containing genes expressed in lower level in ER<sup>-</sup> breast cancer, we named it as Lower Cluster in Patients (LCP). In the case of the TCGA BRCA

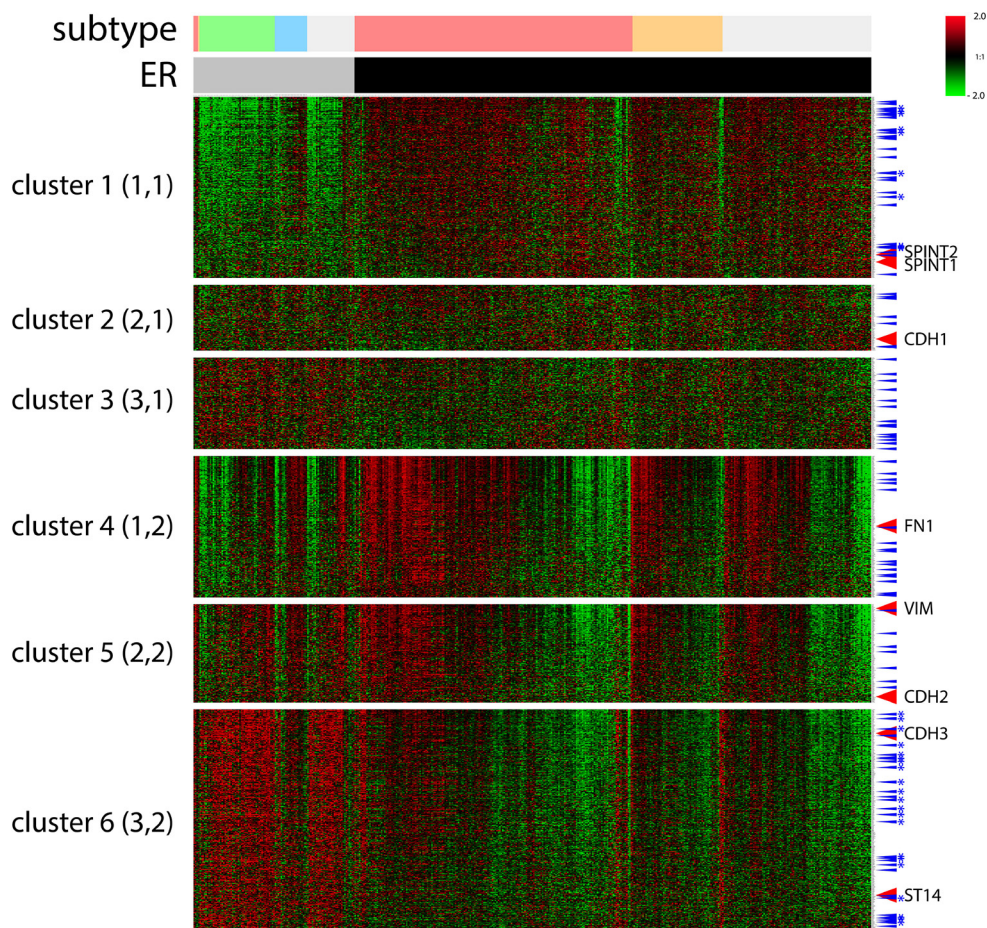

**Figure 3: A cluster analysis of 1085 selected EMT signature genes by ER expression status of TCGA BRCA data by a SOM analysis.** Six clusters (3X2) were applied using an Euclidean distance. ER status: ER<sup>-</sup>, gray bar, ER<sup>+</sup>, black bar. Breast cancer subtypes: luminal A, pink, luminal B, orange, TN, green, HER2, sky blue, unclassified, light gray. TFs, blue arrow, TFs of cluster 1 and 6 common in two different datasets, with stars. Signature EMT markers along with ST14/Prss14 and inhibitors were indicated. Color key: -2.0 (green) to 2.0 (red).

dataset, cluster 6 and cluster 1 (Figure 3) are HCP1 and LCP1, respectively. When HCP1 and LCP1 were compared to those of the GEO dataset, HCP2 and LCP2 (Figure 4A–4B), a large proportion of the EMT genes were coclustered (Figure 4C): 252 HCP genes, named as HCP3, are positioned in both HCP1 and HCP2 (Table S2) and 120 LCP genes, named as LCP3, are positioned in both LCP1 and LCP2 (Table S3, Figure 4C).

### Coexpression analyses of EMT signature genes and ST14/Prss14 in ER<sup>-low</sup> and ER<sup>+high</sup> breast cancer patients

To study the regulatory mechanism of ST14/Prss14 expression during the EMT process in detail, we next examined the degree of correlation between well-known EMT signature genes and ST14/Prss14 in ER<sup>+high</sup> and ER<sup>-low</sup> populations (TCGA,  $n = 459$ , where ER<sup>-</sup> and ER<sup>+</sup> was judged by IHC and GSE20685,  $n = 108$ , where ER<sup>high</sup> and ER<sup>low</sup> were determined by above and below the standard deviation based on the average value). Although ST14/Prss14 expression is distinctively high, none of the EMT stage specific genes among CDH1, VIM, FN1, CDH2 showed a clear correlation with ST14/Prss14 (Figure 5A). However, the majority of CDH2 high expressors, low in numbers, reside in the ST14/Prss14 high population. Interestingly relatively less studied P-cadherin (CDH3) showed the significant correlation values both in ER<sup>-low</sup> and ER<sup>+high</sup> ( $P < 0.001$ ). These analyses suggest that ST14/Prss14 expression in the ER<sup>-low</sup> population could not be assigned to any conventional specific EMT stages, pre-EMT or post-EMT states.

Next, coexpression values of well-known EMT TFs in HCP3 and LCP3 clusters, whose protein class was based on PANTHER, are shown in Table 3, where 18 TFs in HCP3 show high positive correlation values (Figure 5B), and 6 TFs in LCP3 show negative correlation values with ST14/Prss14 (Figure 5C). HMGA1, ELF5, CEBPB, and VGLL1 have the highest positive correlation values over 0.4, suggesting probable positive regulation of ST14/Prss14 expression. Interestingly, a majority of YBX1 and HIF1A positive populations in ER<sup>-low</sup> breast cancers are also ST14/Prss14 high expressors (Figure 5B). Six TFs (ER, TBX3, SMAD3, TSHZ1, PTGER3, and TRPS1) yielded well distinguishable separate high and low populations, suggesting they may function as negative regulators of ST14/Prss14 in ER<sup>-low</sup> populations (Figure 5C).

In addition, we examined the previously well-characterized EMT TFs outside of HCP3 and LCP3 clusters (Figure 5D). In cases of TWIST1 and ZEB1, they show negative correlations ( $r = -0.1639$ ,  $P < 0.001$  and  $r = -0.1577$ ,  $P < 0.01$ , respectively). ZEB1 is previously shown to be a negative regulator of ST14/

Prss14 expression [47]. ZEB2 and SNAI2 did not show strong correlation values with ST14/Prss14 in either ER<sup>-low</sup> or ER<sup>+high</sup> breast cancers.

Next, we navigated putative cellular function or signal pathways of associated TFs through a text mining tool (Figure S3). The majority of TFs in HCP3 were associated with cell migration, and stem cell development, cancer progression, and metastasis, in addition to EMT. Therefore, TFs which are expressed highly in ER<sup>-low</sup> breast cancer populations have a strong connection to cancer progression and metastasis through EMT as well as to regulation of the expressions of ST14/Prss14. In contrast, fewer known functions such as regulation of granulocyte differentiation and steroid hormone receptor activity, were associated with TFs in the LCP3 group.

### Analyses of gene sets with cultured breast cancer cells reveal a paradox in ST14/Prss14 expression

In order to further verify the regulatory mechanism of ST14/Prss14 expression, we decided to examine expression of EMT signature genes in cultured breast cancer cell lines. Two sets of mRNA array data of breast cancer cell lines (5 in NCI-60 and 57 in CCLE databases) were sorted according to ER expression status. Next, EMT signature genes were clustered according to the ER status. For comparison with the patients' data (HCPs LCPs), we named the cluster with high expression level in ER<sup>low</sup> as Higher Cluster in Cell (HCC) and the one with low expression in ER<sup>low</sup> as Lower Cluster in Cell (LCC). We extracted from two different cell line databases, NCI-60 and CCLE, and named them HCC1/LCC1 (Figure 6A) and HCC2/LCC2 (Figure 6B), respectively. 294 genes (HCC3, Table S4), were identified common in HCC1 and HCC2, while 228 genes (LCC3, Table S5) were identified common in LCC1 and LCC2 (Figure 6C). When HCP3/LCP3 and HCC3/LCC3 were compared, there were only 74 genes in the high group and 69 genes in the low group showing the significant discrepancy between patient data and cell line data. Moreover, some genes were allocated to the opposite side in patient and cell line data. Specifically, 17 genes are members of the HCP3 group in the patient data, but, those of the LCC3 group in the cell line data (Figure 6C). ST14/Prss14 is one of such genes: its expression was low in ER<sup>low</sup> breast cancer cell lines, clustered together with CDH1 and its two inhibitors, SPINT1 and SPINT2 (Figure 6A and 6B). We also identified 10 genes differentially positioned from LCP3 to HCC3 (Figure 6C). The list of genes that switched clustering positions from the high to the low (HCP3LCC3) and from the low to the high (LCP3HCC3) are listed in Table 4.

A gene networking of the 17 genes in HCP3LCC3 were searched for putative functional pathways through text mining (Figure 6D). Most genes



**Table 3: Coexpression of common TFs in HCP3 and in LCP3 with ST14/Prss14 among the breast cancer patients**

| HCP3        |                                                           | Correlation with ST14 |         | LCP3        |                                                        | Correlation with ST14 |         |
|-------------|-----------------------------------------------------------|-----------------------|---------|-------------|--------------------------------------------------------|-----------------------|---------|
| Gene symbol | Description                                               | Pearson r             | P value | Gene symbol | Description                                            | Pearson r             | P value |
| HMGA1       | High Mobility Group AT-Hook 1                             | 0.4341                | ****    | ESR1        | Estrogen Receptor 1                                    | -0.4267               | ****    |
| ELF5        | E74-Like Factor 5 (Ets Domain Transcription Factor)       | 0.4306                | ****    | TBX3        | T-Box 3                                                | -0.3803               | ****    |
| CEBPB       | CCAAT/Enhancer Binding Protein (C/EBP), Beta              | 0.4185                | ****    | SMAD3       | SMAD Family Member 3                                   | -0.3796               | ****    |
| VGLL1       | Vestigial-Like Family Member 1                            | 0.4113                | ****    | TSHZ1       | Teashirt Zinc Finger Homeobox 1                        | -0.3646               | ****    |
| FOXC1       | Forkhead Box C1                                           | 0.3980                | ****    | PTGER3      | Prostaglandin E Receptor 3 (Subtype EP3)               | -0.2687               | ****    |
| YBX1        | Y Box Binding Protein 1                                   | 0.3757                | ****    | MSX2        | Msh Homeobox 2                                         | -0.2477               | ****    |
| SOX10       | SRY (Sex Determining Region Y)-Box 10                     | 0.3550                | ****    | SPDEF       | SAM Pointed Domain Containing ETS Transcription Factor | -0.2394               | ****    |
| FOSL1       | FOS-Like Antigen 1                                        | 0.3428                | ****    | TSC22D3     | TSC22 Domain Family, Member 3                          | -0.2328               | ****    |
| ARNTL2      | Aryl Hydrocarbon Receptor Nuclear Translocator-Like 2     | 0.3366                | ****    | TRPS1       | Trichorhinophalangeal Syndrome I                       | -0.2219               | ****    |
| CSDA        | Y Box Binding Protein 3                                   | 0.3362                | ****    | MTA3        | Metastasis Associated 1 Family, Member 3               | -0.2152               | ****    |
| NOTCH1      | Notch 1                                                   | 0.3268                | ****    | ZHX2        | Zinc Fingers And Homeoboxes 2                          | -0.1387               | ***     |
| SOX9        | SRY (Sex Determining Region Y)-Box 9                      | 0.3181                | ****    | LEF1        | Lymphoid Enhancer-Binding Factor 1                     | -0.1309               | **      |
| ETS1        | V-Ets Avian Erythroblastosis Virus E26 Oncogene Homolog 1 | 0.3152                | ****    | ZBTB38      | Zinc Finger And BTB Domain Containing 38               | -0.1280               | **      |
| GRHL1       | Grainyhead-Like 1 (Drosophila)                            | 0.3130                | ****    | GSC         | Gooseoid Homeobox                                      | -0.1183               | **      |
| TCF3        | Transcription Factor 3                                    | 0.3044                | ****    | OVOL2       | Ovo-Like Zinc Finger 2                                 | -0.0938               | *       |
| NFE2L3      | Nuclear Factor, Erythroid 2-Like 3                        | 0.2570                | ****    | PBX1        | Pre-B-Cell Leukemia Homeobox 1                         | -0.0580               | ns      |
| ZNF532      | Zinc Finger Protein 532                                   | 0.2538                | ****    | GRHL2       | Grainyhead-Like 2 (Drosophila)                         | -0.0446               | ns      |
| ETV5        | Ets Variant 5                                             | 0.2388                | ****    | RUNX1       | Runt-Related Transcription Factor 1                    | -0.0350               | ns      |

|         |                                                                                         |        |      |         |                                                  |        |    |
|---------|-----------------------------------------------------------------------------------------|--------|------|---------|--------------------------------------------------|--------|----|
| HIF1A   | Hypoxia Inducible Factor 1, Alpha Subunit (Basic Helix-Loop-Helix Transcription Factor) | 0.2237 | **** | CREB3L1 | CAMP Responsive Element Binding Protein 3-Like 1 | 0.0558 | ns |
| SNAI1   | Snail Family Zinc Finger 1                                                              | 0.2223 | **** |         |                                                  |        |    |
| PLAGL1  | Pleiomorphic Adenoma Gene-Like 1                                                        | 0.2187 | **** |         |                                                  |        |    |
| FOXD1   | Forkhead Box D1                                                                         | 0.2177 | **** |         |                                                  |        |    |
| ZBED2   | Zinc Finger, BED-Type Containing 2                                                      | 0.1272 | **   |         |                                                  |        |    |
| HMGA2   | High Mobility Group AT-Hook 2                                                           | 0.1219 | **   |         |                                                  |        |    |
| PRDM1   | PR Domain Containing 1, With ZNF Domain                                                 | 0.1017 | *    |         |                                                  |        |    |
| ZNF521  | Zinc Finger Protein 521                                                                 | 0.0956 | *    |         |                                                  |        |    |
| PCOLCE2 | Procollagen C-Endopeptidase Enhancer 2                                                  | 0.0688 | ns   |         |                                                  |        |    |
| MYC     | V-Myc Avian Myelocytomatosis Viral Oncogene Homolog                                     | 0.0303 | ns   |         |                                                  |        |    |

Common TFs in TCGA BRCA and GSE20685 analyzed correlation with ST14/Prss14. TFs in HCP3 and LCP3 were arranged by the degree of correlation values with ST14/Prss14.

\* $P \leq 0.05$ , \*\* $P \leq 0.01$ . \*\*\* $P \leq 0.001$ , \*\*\*\* $P \leq 0.0001$ , ns (not significant).

have genetic interaction among them or the proteins they encode are co-localized. In their subcellular localization according to Genecard (<http://www.genecards.org>), the majority of gene products are present in the extracellular space, the plasma membrane, and/or the nucleus (Table 5). Some of the genes were apparently associated with cell growth, granulocyte migration, cell chemotaxis, and cell-cell adhesion. Many genes are localized in the extracellular space and/or plasma membrane, suggesting participation in the progression of ER<sup>-</sup> breast cancer responding to external stimulus.

Due to these apparent discrepancies of gene expression patterns between patient and cell line data, we decided to look at these outliers, HCP3LCC3 and LCP3HCC3, with more attention. To exclude the possibility that the increased expression level of ST14/Prss14 in ER<sup>-</sup> patients may have resulted from other types of cells in the cancer microenvironment, we analyzed stromal or immune signature genes (Figure 7A). The expressions of stromal and immune signature genes did

not show any bias, but were generally similar in ER<sup>-</sup> and ER<sup>+</sup> cancers. However, the epithelial cell specific adhesion molecule (EpCAM) is distinctively higher in the ER<sup>-</sup> population than in the ER<sup>+</sup> population (Figure 7A), showing strong positive correlation with ST14/Prss14 ( $r = 0.2213$ ,  $P < 0.001$ ) (Figure 7B). These results suggest that high expression of ST14/Prss14 in the ER<sup>-</sup> population is more likely coming from the cancer tissue rather than from the stromal or immune cells.

In an attempt to elucidate the underlining mechanism of regulating ST14/Prss14 expression, we searched the GEO database to get a hint of regulation by exogenous signals, for example, estrogen that is provided from noncancer cells. A basal type ER<sup>-</sup> MDA-MB-231 cell shows undetectably low ST14/Prss14 expression in western blotting (data not shown). When ER is introduced into cell by transfection, ST14/Prss14 expression does not change either by estrogen induction and/or the presence of ER (Figure 7C). In the case of MCF7, a luminal A type ER<sup>+</sup> ST14/Prss14 expressing breast cancer cell

line, ST14/Prss14 expression was diminished when ER expression was depleted by siRNA (Figure 7D). The other 12 out of 16 genes showing the coexpression profile also behaved similarly in the cluster analysis with the conditions by removing ER expression. Furthermore the genes negatively correlated in their expression behaved in an opposite fashion. These results suggest that ST14/Prss14 expression depends on both ER and the cellular environments in ER<sup>+</sup> cell lines. Therefore, regulation of ST14/Prss14 is independently regulated by different mechanisms in ER<sup>+</sup> and ER<sup>-</sup> breast cancer cell lines.

## DISCUSSION

In this report, we evaluated ST14/Prss14 for a prognosis marker and a therapeutic target to ER<sup>-</sup> breast cancer by utilizing various public data.

### ST14/Prss14 alone is sufficient to be an independent prognosis marker for ER<sup>-</sup> breast cancer

Survival of breast cancer patients with higher levels of ST14/Prss14 expression is poor for all breast cancer populations regardless of cancer stages (Figure 1A and 1E). The value of ST14/Prss14 as a prognosis marker is even higher than that of the well known therapeutic target HER2 (Figure 1A). For breast cancer patients with little HER2 expression, ST14/Prss14 expression is especially useful as a prognosis marker (Figure 1B), and therefore for a therapeutic target. ER expression is particularly important to draw a correct prognosis. Expressions of ER and ST14/Prss14 in TCGA and GEO breast cancer patients are clearly in separate populations (Figure 5C). In ER<sup>-</sup> patients, all the low ST14/Prss14

expressors survived while half of the high expressors survived less than 5 years (Figure 1H). Therefore, an expression analysis of ST14/Prss14, for example by classical immunohistochemical analysis as performed in earlier reports [48, 49], together with those of ER and HER2 would provide an added benefit to predict the prognosis of breast cancer patients.

The ratios of ST14/Prss14 to its inhibitors showed minor correlative difference with survival rates of breast cancer patients (Figure 2). The same was true for the survival rates of the cancer stage III–IV group or the ER<sup>-</sup> group. These results indicate the ST14/Prss14 expression itself, but not the ratios to the inhibitors, is critical for the prognosis as proposed earlier in some other types of cancer. The contradiction to earlier reports [36, 37] showing the importance of the ratio in malignant tumor progression can be due to smaller sample sizes and, more likely, lack of genetic classification of breast cancer subtypes in those studies.

Network analysis of expression profiles of ST14/Prss14 substrates and its interactors revealed a context dependent behavior in breast cancer (Table 2). A probable pathway in breast cancer included CDCP1 that has known function in cell migration and cell matrix attachment [50]. Other genes positively associated with ST14/Prss14 include PLAUR, EGFR, and MET. These genes are also well documented for participation in epithelial cancer progression. HPN, PDGFD, MST1 are negatively associated genes, although, in weaker strength. The positively associated genes can play intrinsic roles in epithelial cancer progression together with ST14/Prss14, while the negatively associated genes such as PDGFD and MST1, since they are secreted proteins, may also cooperate with ST14/Prss14 for affecting cancer progression when released from stromal and immune

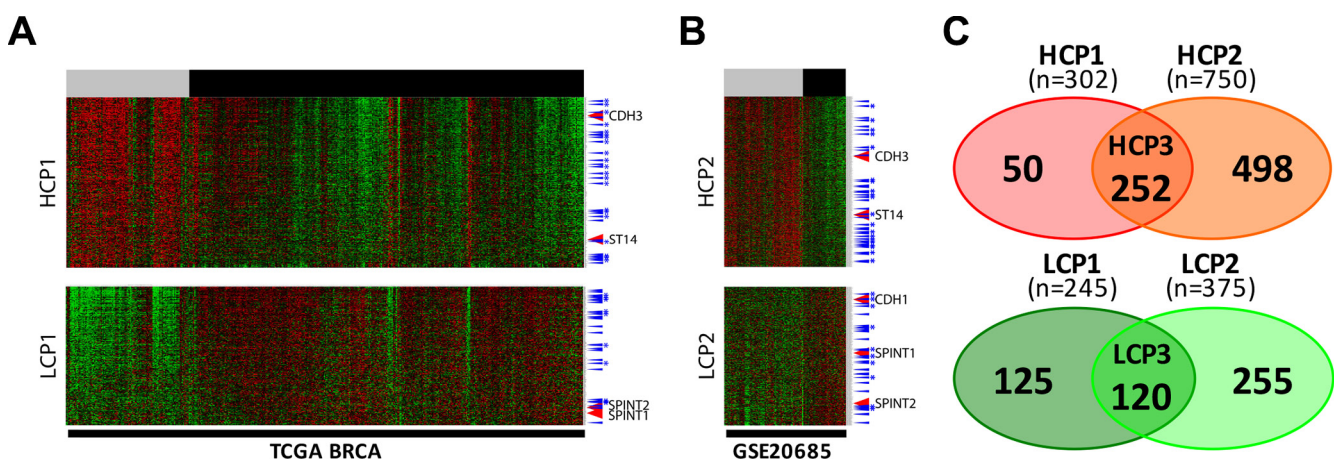

**Figure 4: Two EMT signature gene clusters by ER expression status in two different datasets each cluster was selected after the six clusters were divided by a SOM analysis. (A) TCGA BRCA and (B) GSE20685. High expression cluster in the ER<sup>low</sup> patients group, HCP, low expression cluster in the ER<sup>low</sup> patients group, LCP. ER status: ER<sup>low</sup>, gray bar, ER<sup>high</sup>, black bar. TFs, blue arrow, TFs common in two different datasets, with stars. Color key: -2.0 (green) to 2.0 (red). (C) Two Venn diagram of four gene sets. HCP1 and HCP2 on top, LCP1 and LCP2 at the bottom.**

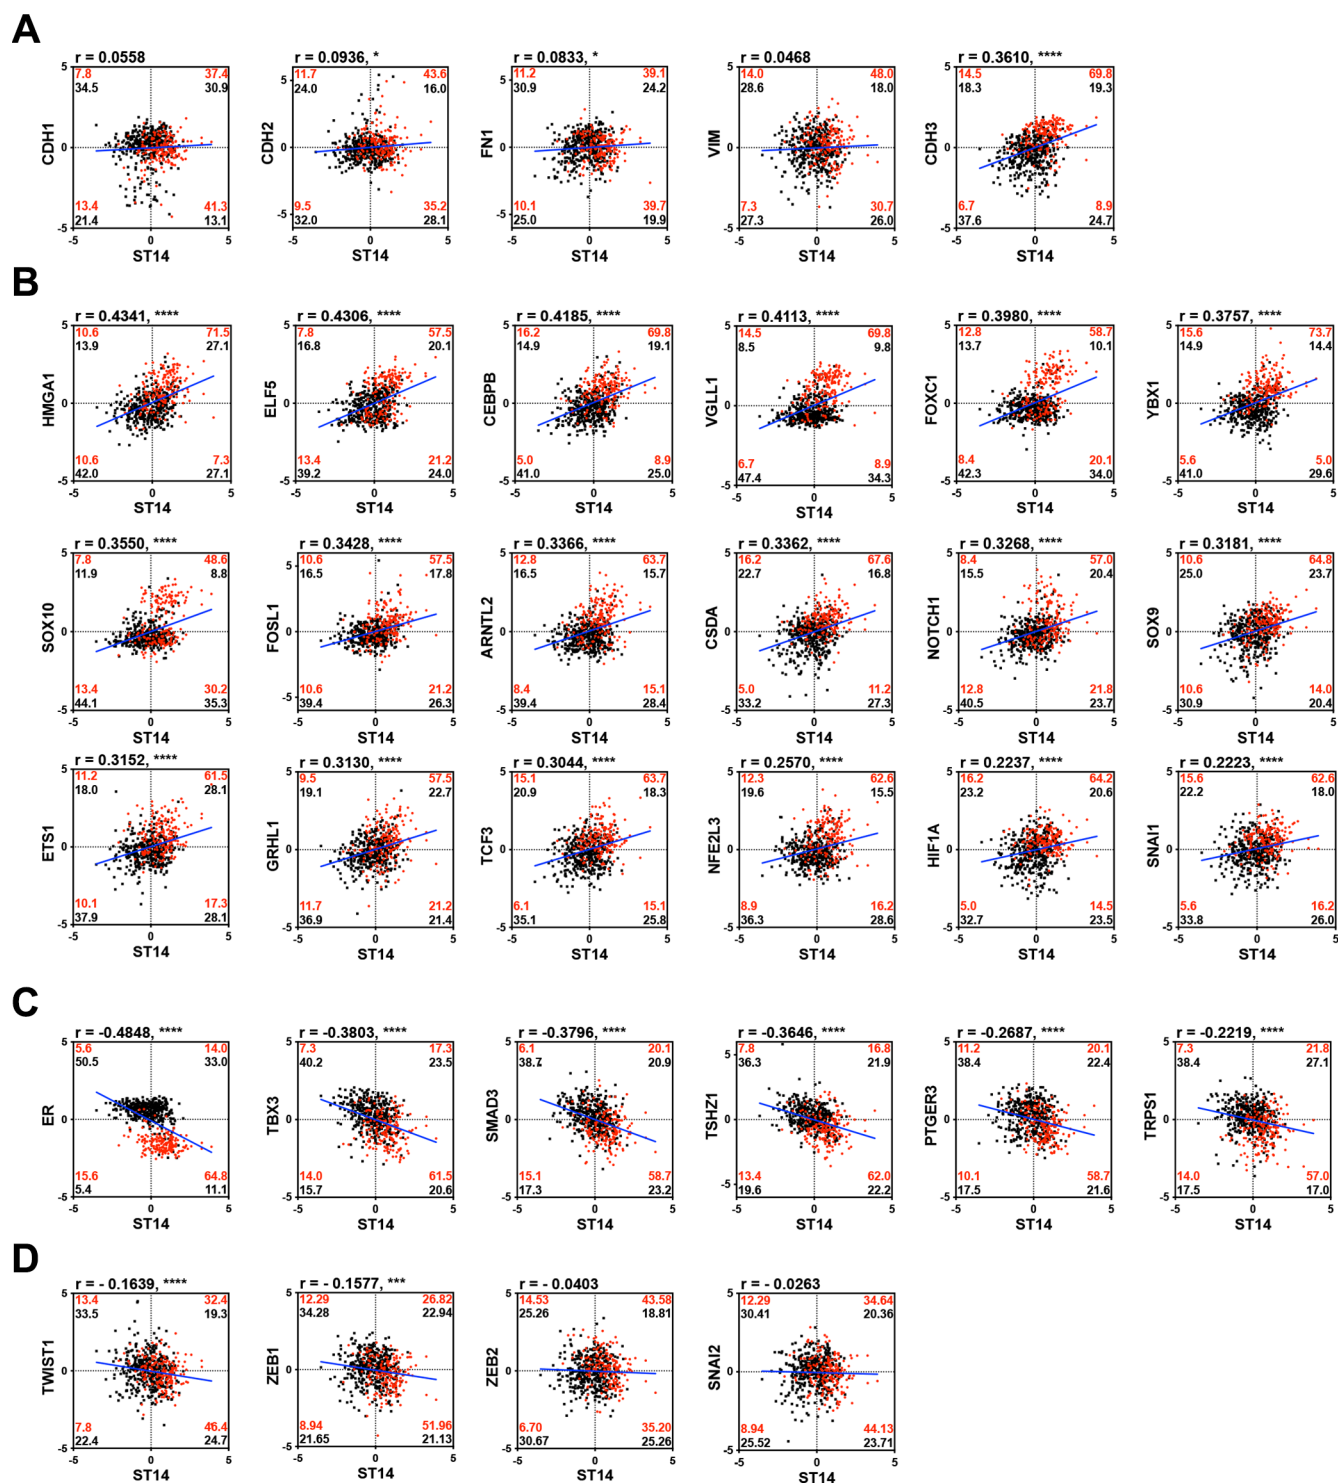

**Figure 5: Correlation analysis of well characterized EMT signature genes and TFs with ST14/Prss14 in ER<sup>-low</sup> and ER<sup>+high</sup> population.** (A) Scatter plots of well-known EMT progression markers, (B) common TFs in HCP3, (C) LCP3, and (D) TFs in other clusters. Correlation coefficient  $r$  values between two genes were computed using Pearson correlation calculations. Two-tailed  $P$  values were calculated by an unpaired  $t$  test.  $*P < 0.05$ ,  $***P < 0.001$ ,  $****P < 0.0001$ . Percentages of population by two genes expression in each ER<sup>-low</sup> (red) and ER<sup>+high</sup> (black) groups were marked in each quadrants. Linear interpolation line in whole patients, blue line.

cells near cancer. Because ST14/Prss14 can be activated by an autoactivation mechanism, it may work as a master key activating these substrates and thus initiating various signaling pathways on cancer cells (and/or stromal and immune cells nearby) during ER<sup>-</sup> breast cancer progression and metastasis.

### Does ST14/Prss14 play an alternative role in EMT pathways?

In a previous experiment with various epithelial cell lines, we showed ST14/Prss14 is necessary and sufficient for the EMT process [14]. In the other hand, SPINT1 was also previously shown to be involved in the EMT process [51]. However, the detailed mechanisms

of how they participate in EMT is still unknown. In fact, our understanding for the EMT process is very limited although the stages can be divided into 4 steps [43]. The EMT process may also be comprised of multiple pathways as well as multiple steps, and not likely just turning on and off genetic switches.

Our initial search for the clues of ST14/Prss14's roles in the EMT process was done by clustering a total of 1085 selected EMT signature genes (Table S1) from TCGA and GEO breast cancer patient data (Figure S2 and Figures 3, 4). Those EMT signature genes in the breast cancer patients, when grouped according to ER expression level first, were clustered into 6 groups with distinct patterns (Figure 3). Typical EMT stage specific markers are positioned in different clusters showing differential

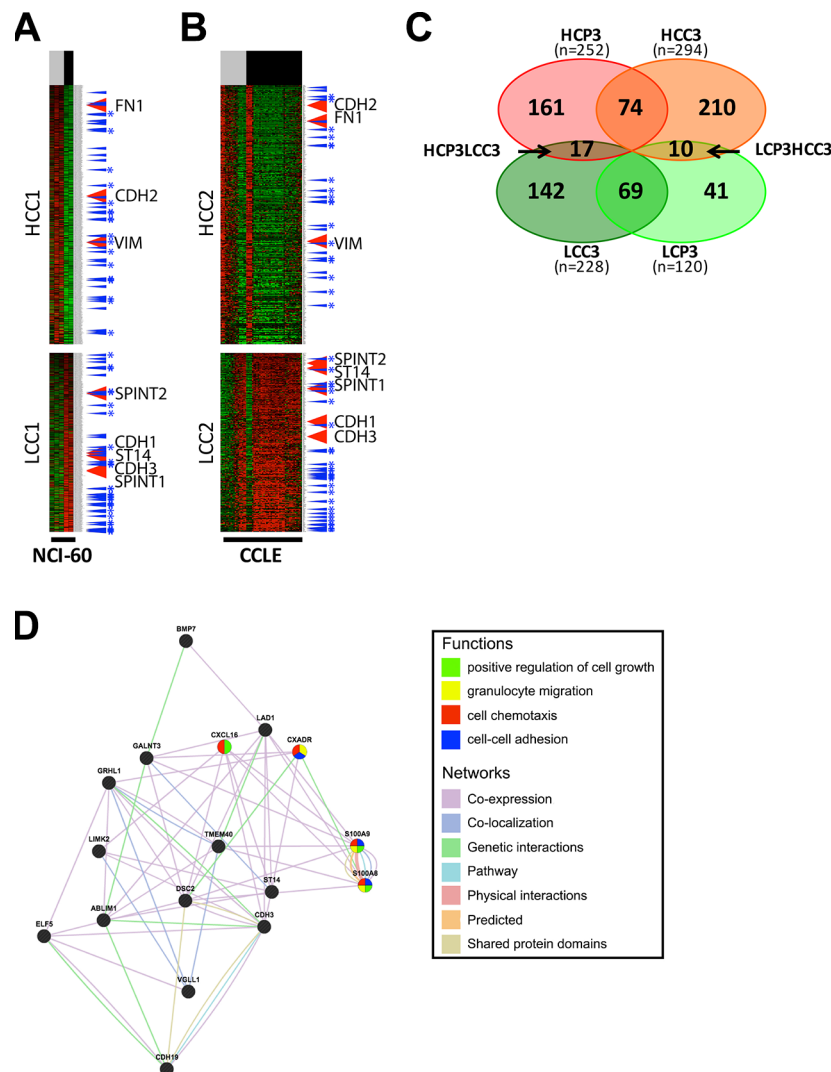

**Figure 6: Analysis and gene networking of EMT genes coexpressed in cell lines.** (A–B) EMT signature genes are clustered by ER expression status in breast cancer cell lines of NCI-60 and CCLE. Each cluster was selected after clusters were divided by a SOM analysis. High expression cluster in ER<sup>low</sup> cell lines group, HCC, low expression cluster in ER<sup>low</sup> cell lines group, LCC. ER status: ER<sup>low</sup>, gray bar, ER<sup>high</sup>, black bar. TFs, blue arrow, TFs common in two different datasets, blue with stars. (C) A Venn diagram of four gene sets, HCP3, LCP3, HCC3, and LCC3. (D) Gene network and functional analysis of HCP3LCC3 gene set coexpressed with ST14/Prss14 in HCP3 and LCC3.

**Table 4: List of HCP3LCC3 and LCP3HCC3 genes**

| HCP3LCC3           |                                                        | LCP3HCC3            |                                                                        |
|--------------------|--------------------------------------------------------|---------------------|------------------------------------------------------------------------|
| Gene symbol        | Description                                            | Gene symbol         | Description                                                            |
| ABLIM1             | Actin Binding LIM Protein 1                            | FGFR1               | Fibroblast Growth Factor Receptor 1                                    |
| BMP7               | Bone Morphogenetic Protein 7                           | GALNT5              | Polypeptide<br>N-Acetylgalactosaminyltransferase 5                     |
| CDH19              | Cadherin 19, Type 2                                    | IL6ST               | Interleukin 6 Signal Transducer                                        |
| CDH3               | Cadherin 3, Type 1, P-Cadherin<br>(Placental)          | NAV3                | Neuron Navigator 3                                                     |
| CXADR              | Coxsackie Virus And Adenovirus<br>Receptor             | PHLDB2              | Pleckstrin Homology-Like Domain,<br>Family B, Member 2                 |
| CXCL16             | Chemokine (C-X-C Motif) Ligand 16                      | POLK                | Polymerase (DNA Directed) Kappa                                        |
| DSC2               | Desmocollin 2                                          | SLC4A7              | Solute Carrier Family 4, Sodium<br>Bicarbonate Cotransporter, Member 7 |
| ELF5 <sup>†</sup>  | E74-Like Factor 5 (Ets Domain<br>Transcription Factor) | SMAD3 <sup>†</sup>  | SMAD Family Member 3                                                   |
| GALNT3             | Polypeptide<br>N-Acetylgalactosaminyltransferase 3     | THBS1               | Thrombospondin 1                                                       |
| GRHL1 <sup>†</sup> | Grainyhead-Like 1 (Drosophila)                         | ZBTB38 <sup>†</sup> | Zinc Finger And BTB Domain<br>Containing 38                            |
| LAD1               | Ladinin 1                                              |                     |                                                                        |
| LIMK2              | LIM Domain Kinase 2                                    |                     |                                                                        |
| S100A8             | S100 Calcium Binding Protein A8                        |                     |                                                                        |
| S100A9             | S100 Calcium Binding Protein A9                        |                     |                                                                        |
| ST14               | Suppression Of Tumorigenicity 14<br>(Colon Carcinoma)  |                     |                                                                        |
| TMEM40             | Transmembrane Protein 40                               |                     |                                                                        |
| VGLL1 <sup>†</sup> | Vestigial-Like Family Member 1                         |                     |                                                                        |

Genes coexpressed in breast cancer patients and cell lines were analyzed for coexpression with ST14/Prss14. The list was arranged by the degree of correlation values with ST14/Prss14.

†, Transcription factor.

expression patterns based on breast cancer subtypes. The position of ST14/Prss14 in the cluster is near post EMT markers, suggesting it may function in post EMT stages. However, a lack of a strong correlation of ST14/Prss14 with any of stage specific markers suggests ST14/Prss14 behaves in an unorthodox way.

Next, the same set of selected EMT signature genes were applied for the same analyses with the datasets from breast cancer cell lines (NCI-60 and CCLE databases, Figure 6). Interestingly, ST14/Prss14 expression was

positioned in closer association with CDH1 expression in clustering. These results are consistent with previous reports on various types of cancer cell lines [52, 53]. This is in contrast to the fact that the position of ST14/Prss14 is closer to CDH2 in our patient's data revealing a possible discrepancy in the data between patient and cell line (see discussion later).

To understand the regulation of gene expression, coexpressing TFs were searched. Among the well known key TFs in EMT, SNAI1 in HCP3, TWIST 1 and ZEB1

**Table 5: Subcellular localization of genes in the HCP3LCC3 gene set**

| Gene symbol | Description                                         | Protein Class        | Extracellular space | Plasma membrane | Cytosol | Cytoskeleton | Golgi apparatus | Mitochondrion | Peroxisome | Lysosome | Endoplasmic reticulum | Nucleus |
|-------------|-----------------------------------------------------|----------------------|---------------------|-----------------|---------|--------------|-----------------|---------------|------------|----------|-----------------------|---------|
| ST14        | Suppression Of Tumorigenicity 14 (Colon Carcinoma)  | enzyme               | o                   | o               |         |              |                 |               |            |          |                       |         |
| GALNT3      | Polypeptide N-Acetylgalactosaminyltransferase 3     | enzyme               | o                   | o               |         |              | o               | o             | o          | o        | o                     |         |
| LIMK2       | LIM Domain Kinase 2                                 | enzyme               |                     |                 | o       | o            |                 |               |            |          |                       | o       |
| CXADR       | Coxsackie Virus And Adenovirus Receptor             | cell adhesion        | o                   | o               |         |              |                 |               |            |          | o                     | o       |
| DSC2        | Desmocollin 2                                       | cell adhesion        | o                   | o               |         | o            |                 |               |            |          | o                     |         |
| CDH3        | Cadherin 3, Type 1, P-Cadherin (Placental)          | cell adhesion        | o                   | o               | o       |              | o               |               | o          | o        | o                     |         |
| CDH19       | Cadherin 19, Type 2                                 | cell adhesion        |                     | o               |         |              |                 |               | o          |          |                       |         |
| LAD1        | Ladinin 1                                           | structural protein   | o                   |                 | o       | o            |                 |               |            |          |                       | o       |
| ABLIM1      | Actin Binding LIM Protein 1                         | cytoskeletal protein |                     |                 | o       | o            |                 |               |            |          |                       | o       |
| S100A9      | S100 Calcium Binding Protein A9                     | signaling molecule   | o                   | o               | o       | o            |                 |               |            |          |                       | o       |
| S100A8      | S100 Calcium Binding Protein A8                     | signaling molecule   | o                   | o               | o       | o            |                 | o             |            |          |                       | o       |
| CXCL16      | Chemokine (C-X-C Motif) Ligand 16                   | chemokine            | o                   | o               |         |              |                 |               |            |          |                       | o       |
| BMP7        | Bone Morphogenetic Protein 7                        | growth factor        | o                   | o               | o       | o            | o               | o             | o          | o        |                       | o       |
| GRHL1       | Grainyhead-Like 1 (Drosophila)                      | transcription factor | o                   | o               | o       |              | o               | o             | o          |          | o                     | o       |
| VGLL1       | Vestigial-Like Family Member 1                      | transcription factor | o                   |                 |         |              |                 |               |            |          |                       | o       |
| ELF5        | E74-Like Factor 5 (Ets Domain Transcription Factor) | transcription factor | o                   |                 | o       |              |                 |               | o          |          |                       | o       |
| TMEM40      | Transmembrane Protein 40                            | not known            |                     |                 |         |              |                 |               | o          |          |                       |         |

Location of expressed proteins in the HCP3LCC3 gene list was marked in gray. Through the COMPARTMENTS database (<http://compartments.jensenlab.org/Search>), all cases which were reported more than one were shown.

appear on the list for coexpressors (Figure 5B and 5D). When degrees of correlations between expression levels of ST14 and TFs were calculated in ER<sup>-</sup> populations as shown in Figure 5B, HMGA1, ELF5, CEBPB, VGLL1, showed higher correlation ( $r > 0.4$ ) in the ER<sup>-</sup> population. A strongly associated gene, HMGA1 is still a mystery regarding its role in EMT. When those genes are networked by functions in Figure S3A, a majority

of the genes are linked but with still uncharacterized functions. The most prominent features of the output, so far, include cell migration and Notch signaling in addition to EMT function. From these results altogether, we concluded that ST14/Prss14 is regulated in yet to be determined steps and pathways during the EMT process. Experimental approaches from these results will provide further details.

ST14/Prss14 is located in the clusters of ER<sup>-</sup> breast cancer patients but in the ER<sup>+</sup> cell lines. As seen in Figures 3 and 5C, all ER<sup>-</sup> cancers show high ST14/Prss14 expression. However, ST14/Prss14 as well as CDH3 shifted their location to the low group (LCC3) in cell lines from the high group (HCP3) in patients (HCP3LCC3). In addition to ST14/Prss14, other genes in HCP3LCC3 are ABLIM1, BMP7, CDH19, CDH3, CXADR, CXCL16, DSC2, ELF5, GALNT1, GRHL1, LAD1, LIMK2, S100A8, S100A9, TME40, VGLL1 (Table 4 and Table 5). Three transcription factors, GRHL1, VGLL1, and ELF5 are strong candidates for the cell autonomous regulation of ST14/Prss14 in basal type ER<sup>-</sup> breast cancer patients and ER<sup>+</sup> luminal A type breast cancer cell lines.

### Paradox of ST14/Prss14 expression in breast cancer patient and in cell lines regarding ER expression and cell subtypes

In search of explanations of this apparent paradox of ER expression and ST14/prss14 in breast cancer patients and cell lines, we approached the issues as follows. Since ST14/Prss14 is able to shed into the media [7, 11–14, 54], it may therefore have function in trans. Therefore, ST14/Prss14 expression can be also contributed from a cancer microenvironment. Our earlier finding on the expression in activated macrophage [16] also supports this idea. However, correlation analysis of ST14/Prss14 and the specific epithelial marker EpCAM showed statistically significant values for positivity while stromal/immune signature genes show no correlation (Figure 7B). We interpret these as supporting results that the majority of

the ST14/Prss14 message is coming from the ER<sup>-</sup> cancer tissue. In addition, a study involving IHC shows ST14/Prss14 expression in cancer tissue, not in stromal tissue [55]. However, we cannot formally exclude that part of ST14/Prss14 expression is coming from immune cells such as from activated macrophages. To resolve this issue, more careful experimental approaches are necessary.

The resolution of this paradox appears not so simple at this point. As seen in the coexpression analysis of known substrates (Table 2), only part of known ST14/Prss14 functions are likely to be active in a breast cancer context. Therefore a context dependent role of this protein may also take part in eliciting variables, including often contradictory roles as is documented in the case of BMP7 [56, 57]. It may also be dependent on the three dimensional tissue structure and/or to particular extracellular matrix proteins as suggested in the networking of integrins [58]. Any of the above proposals cannot completely explain the complicated paradox at this point and answers to questions will need to wait for many more experiments.

### An important issue in biomarker and therapeutic target discovery using cell line models

In any case, detail mode of action studies on the mechanism of ST14/Prss14 expression in different cell populations, cancer tissues, and the microenvironment will be necessary to target ST14/Prss14 with therapeutic approaches. This paradoxical gene expression profiles serious perils if prognosis and therapeutic evaluations are derived solely from the cell cultures. As seen in an earlier

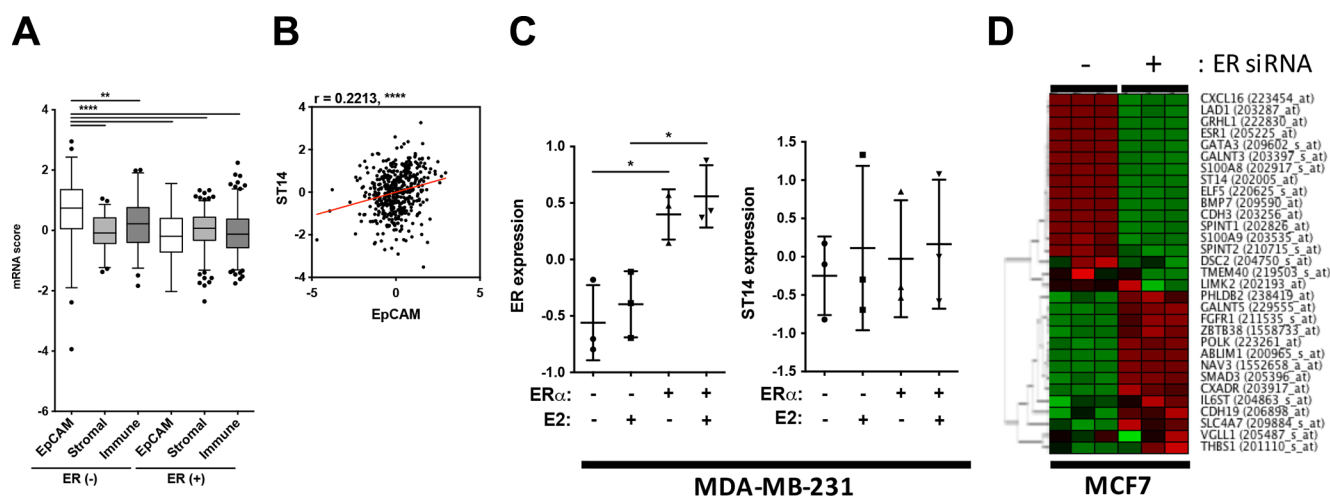

**Figure 7: Evaluation of ST14/Prss14 expression in breast cancer patients and cancer cell lines.** (A) ST14/Prss14 expression in cancer tissue or cancer microenvironment using signature gene analysis. A box plot of mRNA scores of EpCAM, stromal signature, and immune signatures separated by ER expression status. (B) A scatter plot of correlation between ST14/Prss14 and EpCAM. Linear interpolation curve between two genes in TCGA BRCA patients - red line.  $r = 0.2213$ ,  $P < 0.0001$ . (C) ER and ST14/Prss14 expression with ER gene introduction (ER $\alpha$ ) and 17 beta-estradiol (E2) treatment in MDA-MB-231 cell. The line in the middle is plotted at the point of means.  $*P < 0.05$ . (D) A cluster of HCP3LCC3 and LCP3HCC3 gene sets by ER expression in MCF7 cells. Cluster was examined by HCL analysis, using Euclidean distance. Color key: -1.95 (green) to 1.95 (red).



analysis with cell lines and patients' data [59], smaller scales without subgrouping breast cancer types may lead to the contradicting results [59]. Although expression profiling of the breast cell lines was claimed to provide proper models for breast cancers [60], it is critical to include whole gene profiling with patients cancer samples, not only for marker discovery and correct prognosis, but also for individual based therapeutics in the future.

## MATERIALS AND METHODS

### Datasets

Two public datasets for breast cancer patients were obtained from the Cancer Genome Atlas Project (TCGA) (<http://cancergenome.nih.gov/>) and NCBI Gene Expression Omnibus (GEO) (<http://www.ncbi.nlm.nih.gov/geo/>). The gene expression data include breast invasive carcinoma (BRCA) patients (level 3), enrolled from 2010–2013. The original 603 patients' data were reduced to 464 patients after removing duplicated samples. The only data annotated with the clinical data were selected for use in the analysis. Two array expression datasets of breast cancer cell lines were derived from the CellMiner database (<http://discover.nci.nih.gov/cellminer/home.do>) and the Cancer Cell Line Encyclopedia (CCLE, <http://www.broadinstitute.org/ccle/home>). Agilent mRNA array data of NCI-60 cell lines in the CellMiner database provided 5 breast cancer cell lines. Normalized mRNA expression data of CCLE had 57 breast cancer cell lines chosen from about 1,000 different cancer cell lines. Two experiment sets of data, regulating the expression of ER in MCF7 and MDA-MB-231, were obtained from GEO (GSE27473 and GSE2251).

### Group classification

TCGA patients were classified by cancer stages, I–II and III–IV based on the report with clinical data. Four breast cancer subtypes, luminal A, luminal B, triple negative, and HER2-enriched, were classified by the IHC status of ER, PR, and HER2. After dividing into luminal and non-luminal types by expression of ER and/or PR, four subtypes were determined according to HER2 expression. ER high/low groups of GSE20685 were differentiated by mean  $\pm$  standard deviation of ER. Breast cancer cell lines of NCI-60 and CCLE were grouped by only the mean of ER because of limited sample sizes. Gene high/low groups were determined by mean of each gene in all normalized samples of each dataset. In case of grouping by ER expression status, only TCGA data were divided into negative (–) or positive (+).

### Genesets

EMT signature genes were collected from three commercial data (EMT PCR arrays, QIAGEN/EMT antibody sampler kit, #9782, Cell Signaling technology/cell biology research, R&D), two patents (US20120302572 A1 and US20140155397 A1), and nine studies [49, 51, 61–67]. Genes in the downstream pathway of ST14 were taken from previous publications [15, 19, 21, 24, 31, 68–78]. All gene sets were divided by the standard deviation of each gene after mean centering genes for gene normalization, using software Genesis (<http://genome.tugraz.at>).

### Statistical analysis

For the 5 year survival curves, data of TCGA BRCA patients were processed in a Kaplan-Meier survival analysis after excluding those whose contacts were lost. The *P* value was calculated using a Log-rank (Mantel-Cox) test and the hazard ratio (HR) was determined by the Mantel-Haenszel method ([http://www.graphpad.com/guides/prism/6/statistics/index.htm?stat\\_the\\_hazard\\_ratio.htm](http://www.graphpad.com/guides/prism/6/statistics/index.htm?stat_the_hazard_ratio.htm)). For the mRNA expression analysis, normalized values were drawn in box plots. The differences between multiple groups were assessed by a one-way ANOVA. A ratio of ST14/Prss14 to SPINT1 and SPINT2 was calculated by substituting values with the logarithm to the base of 2. For the correlation analysis, expression values of all patients were drawn in scatter plots with linear interpolation curves between the two genes. The correlation coefficient *r* values between the two genes were computed using Pearson correlation calculations. Two-tailed *P* values were calculated by an unpaired *T* test. The populations of TFs and ST14 by ER status were computed into percentages against each ER<sup>low</sup> and ER<sup>high</sup>. To analyze stromal and immune scores in the TCGA BRCA dataset, those signature genes, referred to in the publication [79], were selected. After normalization, each stromal and immune score was calculated as an average. All statistical analyses were performed in GraphPad Prism (version 6).

### Cluster analysis

Cluster analyses were examined with self-organizing maps (SOM) using Euclidean distances and calculated 2 to 6 clusters [80]. It was iterated 100,000 times.

### Functional analysis

Gene networking was analyzed by GeneMANIA (<http://www.genemania.org/>). Networks between genes such as co-expression, co-localization, genetic interaction, pathway, physical interactions, predicted, and shared protein domains were indicated with different colored lines. The results of co-expression were referenced by the top 10%

publication size (29/287). Network weighting was based on molecular function of Gene Ontology. The functions of genes, which had a low value, were additionally marked with colors. Subcellular localizations of the gene set were obtained from the COMPARTMENTS database (<http://compartments.jensenlab.org/Search>). Protein classes of those genes were classified based on PANTHER (<http://pantherdb.org/>).

## ACKNOWLEDGMENTS AND FUNDING

We thank all the people who generated public data and analysis tools. We also thank the members of LMCI, Inha University for their help during this work. Special thanks to Ki Yeon Kim for careful proofreading this manuscript. This work was supported by the Korean Government Grants, (NRF-2013R1A2A2A01069080 and NRF-2013R1A1A2009892 to M.K. and NRF-2013R1A1A1007773 to C.K.) and Inha University Research Grant to M.K.

## CONFLICTS OF INTEREST

None.

## REFERENCES

1. Szabo R, Wu Q, Dickson RB, Netzel-Arnett S, Antalis TM, Bugge TH. Type II transmembrane serine proteases. *Thromb Haemost.* 2003; 90:185–193.
2. Hooper JD, Clements JA, Quigley JP, Antalis TM. Type II Transmembrane Serine Proteases: INSIGHTS INTO AN EMERGING CLASS OF CELL SURFACE PROTEOLYTIC ENZYMES\*. *J Biol Chem.* 2001; 276:857–860.
3. Kim MG, Chen C, Lyu MS, Cho EG, Park D, Kozak C, Schwartz RH. Cloning and chromosomal mapping of a gene isolated from thymic stromal cells encoding a new mouse type II membrane serine protease, epithin, containing four LDL receptor modules and two CUB domains. *Immunogenetics.* 1999; 49:420–428.
4. Lin CY, Anders J, Johnson M, Sang QA, Dickson RB. Molecular cloning of cDNA for matriptase, a matrix-degrading serine protease with trypsin-like activity. *J Biol Chem.* 1999; 274:18231–18236.
5. Takeuchi T, Shuman MA, Craik CS. Reverse biochemistry: use of macromolecular protease inhibitors to dissect complex biological processes and identify a membrane-type serine protease in epithelial cancer and normal tissue. *Proc Natl Acad Sci USA.* 1999; 96:11054–11061.
6. Zhang Y, Cai X, Schlegelberger B, Zheng S. Assignment1 of human putative tumor suppressor genes ST13 (alias SNC6) and ST14 (alias SNC19) to human chromosome bands 22q13 and 11q24—> q25 by *in situ* hybridization. *Cytogenet Cell Genet.* 1998; 83:56–57.
7. Cho E-G, Schwartz RH, Kim MG. Shedding of membrane epithin is blocked without LDLRA4 and its protease activation site. *Biochem Biophys Res Commun.* 2005; 327:328–334.
8. Yan X, Yan Z. An overview of ST14: A type II transmembrane serine protease. *J Sci Appl.* 2015; 3:1–17.
9. List K, Bugge TH, Szabo R. Matriptase: potent proteolysis on the cell surface. *Mol Med.* 2006; 12:1–7.
10. Lin C-Y, Tseng I-C, Chou F-P, Su S-F, Chen Y-W, Johnson MD, Dickson RB. Zymogen activation, inhibition, and ectodomain shedding of matriptase. *Front Biosci.* 2008; 13:621–635.
11. Lee HS, Park BM, Cho Y, Kim S, Kim C, Kim MG, Park D. Shedding of epithin/PRSS14 is induced by TGF- $\beta$  and mediated by tumor necrosis factor- $\alpha$  converting enzyme. *Biochem Biophys Res Commun.* 2014; 452:1084–1090.
12. Kim C, Cho Y, Kang C-H, Kim MG, Lee H, Cho E-G, Park D. Filamin is essential for shedding of the transmembrane serine protease, epithin. *EMBO Rep.* 2005; 6:1045–1051.
13. Kim SB, Lee D, Jeong J-W, Kim C, Park D, Kim MG. Soluble epithin/PRSS14 secreted from cancer cells contains active angiogenic potential. *Mol Cells.* 2010; 29:617–623.
14. Lee HS, Kim C, Kim SB, Kim MG, Park D. Epithin, a target of transforming growth factor- $\beta$  signaling, mediates epithelial–mesenchymal transition. *Biochem Biophys Res Commun.* 2010; 395:553–559.
15. Kim C, Lee HS, Lee D, Lee SD, Cho E-G, Yang SJ, Kim SB, Park D, Kim MG. Epithin/PRSS14 proteolytically regulates angiopoietin receptor Tie2 during transendothelial migration. *Blood.* 2011; 117:1415–1424.
16. Lee D, Lee HS, Yang SJ, Jeong H, Kim D-Y, Lee SD, Oh JW, Park D, Kim MG. PRSS14/Epithin is induced in macrophages by the IFN- $\gamma$ /JAK/STAT pathway and mediates transendothelial migration. *Biochem Biophys Res Commun.* 2011; 405:644–650.
17. List K, Haudenschild CC, Szabo R, Chen W, Wahl SM, Swaim W, Engelholm LH, Behrendt N, Bugge TH. Matriptase/MT-SP1 is required for postnatal survival, epidermal barrier function, hair follicle development, and thymic homeostasis. *Oncogene.* 2002; 21:3765–3779.
18. Lee M-S. Matrix-Degrading Type II Transmembrane Serine Protease Matriptase: Its Role in Cancer Development and Malignancy. *J Cancer Mol.* 2006; 2:183–190.
19. Tripathi M, Potdar AA, Yamashita H, Weidow B, Cummings PT, Kirchhofer D, Quaranta V. Laminin-332 cleavage by matriptase alters motility parameters of prostate cancer cells. *Prostate.* 2011; 71:184–196.
20. Lee SL, Dickson RB, Lin CY. Activation of Hepatocyte Growth Factor and Urokinase/Plasminogen Activator by Matriptase, an Epithelial Membrane Serine Protease. *J Biol Chem.* 2000; 275:36720–36725.

21. Chen M, Chen L-M, Lin C-Y, Chai KX. The epidermal growth factor receptor (EGFR) is proteolytically modified by the Matriptase–Prostasin serine protease cascade in cultured epithelial cells. *Biochim Biophys Acta*. 2008; 1783:896–903.
22. Nagakubo D, Murai T, Tanaka T, Usui T, Matsumoto M, Sekiguchi K, Miyasaka M. A High Endothelial Venule Secretory Protein, Mac25/Angiomodulin, Interacts with Multiple High Endothelial Venule-Associated Molecules Including Chemokines. *J Immunol*. 2003; 171:553–561.
23. List K, Hobson JP, Molinolo A, Bugge TH. Co-localization of the channel activating protease prostasin/(CAP1/PRSS8) with its candidate activator, matriptase. *J Cell Physiol*. 2007. 213:237–245.
24. Jin X, Yagi M, Akiyama N, Hirosaki T, Higashi S, Lin C-Y, Dickson RB, Kitamura H, Miyazaki K. Matriptase activates stromelysin (MMP-3) and promotes tumor growth and angiogenesis. *Cancer Science*. 2006; 97:1327–1334.
25. Tseng I-C, Xu H, Chou FP, Li G, Vazzano AP, Kao JPY, Johnson MD, Lin CY. Matriptase Activation, an Early Cellular Response to Acidosis. *J Biol Chem*. 2010; 285:3261–3270.
26. List K, Szabo R, Molinolo A, Sriuranpong V, Redeye V, Murdock T, Burke B, Nielsen BS, Gutkind JS, Bugge TH. Deregulated matriptase causes ras-independent multistage carcinogenesis and promotes ras-mediated malignant transformation. *Genes Dev*. 2005; 19:1934–1950.
27. List K, Szabo R, Wertz PW, Segre J, Haudenschild CC, Kim S-Y, Bugge TH. Loss of proteolytically processed filaggrin caused by epidermal deletion of Matriptase/MT-SP1. *J Cell Biol*. 2003; 163:901–910.
28. Sales KU, Friis S, Abusleme L, Moutsopoulos NM, Bugge TH. Matriptase promotes inflammatory cell accumulation and progression of established epidermal tumors. *Oncogene*. 2015; 34:4664–4672.
29. Sales KU, Masedunskas A, Bey AL, Rasmussen AL, Weigert R, List K, Szabo R, Overbeek PA, Bugge TH. Matriptase initiates activation of epidermal pro-kallikrein and disease onset in a mouse model of Netherton syndrome. *Nat Genet*. 2010; 42:676–683.
30. Alef T, Torres S, Hausser I, Metze D, Türsen Ü, Lestringant GG, Hennies HC. Ichthyosis, Follicular Atrophoderma, and Hypotrichosis Caused by Mutations in ST14 Is Associated with Impaired Profilaggrin Processing. *J Invest Dermatol*. 2008; 129:862–869.
31. Uhland K. Matriptase and its putative role in cancer. *Cell Mol Life Sci*. 2006; 63:2968–2978.
32. Hoang CD, D’Cunha J, Kratzke MG, Casmey CE, Frizelle SP, Maddaus MA, Kratzke RA. Gene Expression Profiling Identifies Matriptase Overexpression in Malignant Mesothelioma. *CHEST*. 2004; 125:1843–1852.
33. Jarzab B, Wiench M, Fujarewicz K, Simek K, Jarzab M, Oczko-Wojciechowska M, Wloch J, Czarniecka A, Chmielik E, Lange D, Pawlaczek A, Szpak S, Gubala E, et al. Gene expression profile of papillary thyroid cancer: sources of variability and diagnostic implications. *Cancer Res*. 2005; 65:1587–1597.
34. Jin J-S, Hsieh D-S, Loh S-H, Chen A, Yao C-W, Yen C-Y. Increasing expression of serine protease matriptase in ovarian tumors: tissue microarray analysis of immunostaining score with clinicopathological parameters. *Mod Pathol*. 2006; 19:447–452.
35. Tanimoto H, Shigemasa K, Tian X, Gu L, Beard JB, Sawasaki T, O’Brien TJ. Transmembrane serine protease TADG-15 (ST14/Matriptase/MT-SP1): expression and prognostic value in ovarian cancer. *Br J Cancer*. 2005; 92:278–283.
36. Vogel LK, Sæbø M, Skjelbred CF, Abell K, Pedersen EDK, Vogel U, Kure EH. The ratio of Matriptase/HAI-1 mRNA is higher in colorectal cancer adenomas and carcinomas than corresponding tissue from control individuals. *BMC Cancer*. 2006; 6:176.
37. Zeng L. Expression of serine protease SNC19/matriptase and its inhibitor hepatocyte growth factor activator inhibitor type 1 in normal and malignant tissues of gastrointestinal tract. *WJG*. 2005; 11:6202.
38. Gruvberger S, Ringnér M, Chen Y, Panavally S, Saal LH, Borg A, Fernö M, Peterson C, Meltzer PS. Estrogen receptor status in breast cancer is associated with remarkably distinct gene expression patterns. *Cancer Res*. 2001; 61:5979–5984.
39. Liu Z, Zhang X-S, Zhang S. Breast tumor subgroups reveal diverse clinical prognostic power. *Sci Rep*. 2014; 4:4002.
40. Thierry JP, Acloque H, Huang RYJ, Nieto MA. Epithelial-Mesenchymal Transitions in Development and Disease. *Cell*. 2009; 139:871–890.
41. Puisieux A, Brabletz T, Caramel J. Oncogenic roles of EMT-inducing transcription factors. *Nature cell Biol*. 2014; 16:488–494.
42. Osmanbeyoglu HU, Pelosof R, Bromberg JF, Leslie CS. Linking signaling pathways to transcriptional programs in breast cancer. *Genome Res*. 2014; 24:1869–1880.
43. Huang RY-J, Wong MK, Tan TZ, Kuay KT, Ng AHC, Chung VY, Chu Y-S, Matsumura N, Lai H-C, Lee YF, Sim W-J, Chai C, Pietschmann E, et al. An EMT spectrum defines an anoikis-resistant and spheroidogenic intermediate mesenchymal state that is sensitive to e-cadherin restoration by a src-kinase inhibitor, saracatinib (AZD0530). *Cell Death Dis*. 2013; 4:e915.
44. Gröger CJ, Grubinger M, Waldhör T, Vierlinger K, Mikulits W. Meta-Analysis of Gene Expression Signatures Defining the Epithelial to Mesenchymal Transition during Cancer Progression. *PLoS ONE*. 2012; 7:e51136.
45. Huang S-D, Yuan Y, Tang H, Liu X-H, Fu C-G, Cheng H-Z, Bi J-W, Yu Y-W, Gong D-J, Zhang W, Chen J, Xu Z-Y. Tumor Cells Positive and Negative for the Common Cancer Stem Cell Markers Are Capable of Initiating Tumor

- Growth and Generating Both Progenies. *PLoS ONE*. 2013; 8:e54579.
46. Kao K-J, Chang K-M, Hsu H-C, Huang AT. Correlation of microarray-based breast cancer molecular subtypes and clinical outcomes: implications for treatment optimization. *BMC Cancer*. 2011; 11:143.
  47. Wang Y, Rathinam R, Walch A, Alahari SK. ST14 (Suppression of Tumorigenicity 14) Gene Is a Target for miR-27b, and the Inhibitory Effect of ST14 on Cell Growth Is Independent of miR-27b Regulation. *J Biol Chem*. 2009; 284:23094–23106.
  48. Oberst MD, Singh B, Ozdemirli M, Dickson RB, Johnson MD, Lin CY. Characterization of Matriptase Expression in Normal Human Tissues. *J Histochem Cytochem*. 2003; 51:1017–1025.
  49. Kang JY, Dolled-Filhart M, Ocal IT, Singh B, Lin C-Y, Dickson RB, Rimm DL, Camp RL. Tissue microarray analysis of hepatocyte growth factor/Met pathway components reveals a role for Met, matriptase, and hepatocyte growth factor activator inhibitor 1 in the progression of node-negative breast cancer. *Cancer Res*. 2003; 63:1101–1105.
  50. Zarif JC, Lamb LE, Schulz VV, Nollet EA, Miranti CK. Androgen receptor non-nuclear regulation of prostate cancer cell invasion mediated by Src and matriptase. *Oncotarget*. 2015; 6:6862–6876. doi: 10.18632/oncotarget.3119.
  51. Cheng H, Fukushima T, Takahashi N, Tanaka H, Kataoka H. Hepatocyte Growth Factor Activator Inhibitor Type 1 Regulates Epithelial to Mesenchymal Transition through Membrane-Bound Serine Proteinases. *Cancer Res*. 2009; 69:1828–1835.
  52. Gemmill RM, Roche J, Potiron VA, Nasarre P, Mitas M, Coldren CD, Helfrich BA, Garrett-Mayer E, Bunn PA, Drabkin HA. ZEB1-responsive genes in non-small cell lung cancer. *Cancer Lett*. 2011; 300:66–78.
  53. Kohn KW, Zeeberg BM, Reinhold WC, Pommier Y. Gene Expression Correlations in Human Cancer Cell Lines Define Molecular Interaction Networks for Epithelial Phenotype. *PLoS ONE*. 2014; 9:e99269.
  54. Cho EG. N-terminal Processing Is Essential for Release of Epithin, a Mouse Type II Membrane Serine Protease. *J Biol Chem*. 2001; 276:44581–44589.
  55. Obersr M, Anders J, Xie B, Ossandon M, Johnson M, Dickson RB, Lin CY. Matriptase and HAI-1 Are Expressed by Normal and Malignant Epithelial Cells *in vitro* and *in vivo*. *Am J Pathol*. 2001; 158:1301–1311.
  56. Alarmo E-L, Pärssinen J, Ketolainen JM, Savinainen K, Karhu R, Kallioniemi A. BMP7 influences proliferation, migration, and invasion of breast cancer cells. *Cancer Lett*. 2009; 275:35–43.
  57. Buijs JT, Henriquez NV, van Overveld PGM, van der Horst G, Que I, Schwaninger R, Rentsch C, Dijke ten P, Cleton-Jansen AM, Driouch K, Lidereau R, Bachelier R, Vukicevic S, et al. Bone Morphogenetic Protein 7 in the Development and Treatment of Bone Metastases from Breast Cancer. *Cancer Res*. 2007; 67:8742–8751.
  58. Reuter JA, Ortiz-Urda S, Kretz M, Garcia J, Scholl FA, Pasmooij AMG, Cassarino D, Chang HY, Khavari PA. Modeling Inducible Human Tissue Neoplasia Identifies an Extracellular Matrix Interaction Network Involved in Cancer Progression. *Cancer Cell*. 2009; 15:477–488.
  59. Welman A, Sproul D, Mullen P, Muir M, Kinnaird AR, Harrison DJ, Faratian D, Brunton VG, Frame MC. Diversity of matriptase expression level and function in breast cancer. *PLoS ONE*. 2012; 7:e34182.
  60. Kao J, Salari K, Bocanegra M, Choi Y-L, Girard L, Gandhi J, Kwei KA, Hernandez-Boussard T, Wang P, Gazdar AF, Minna JD, Pollack JR. Molecular Profiling of Breast Cancer Cell Lines Defines Relevant Tumor Models and Provides a Resource for Cancer Gene Discovery. *PLoS ONE*. 2009; 4:e6146.
  61. Onder TT, Gupta PB, Mani SA, Yang J, Lander ES, Weinberg RA. Loss of E-Cadherin Promotes Metastasis via Multiple Downstream Transcriptional Pathways. *Cancer Res*. 2008; 68:3645–3654.
  62. Andarawewa KL, Erickson AC, Chou WS, Costes SV, Gascard P, Mott JD, Bissell MJ, Barcellos-Hoff MH. Ionizing radiation predisposes nonmalignant human mammary epithelial cells to undergo transforming growth factor beta induced epithelial to mesenchymal transition. *Cancer Res*. 2007; 67:8662–8670.
  63. Budinska E, Popovici V, Tejpar S, D'Ario G, Lapique N, Sikora KO, Di Narzo AF, Yan P, Hodgson JG, Weinrich S, Bosman F, Roth A, Delorenzi M. Gene expression patterns unveil a new level of molecular heterogeneity in colorectal cancer. *J Pathol*. 2013; 231:63–76.
  64. Choi Y-L, Bocanegra M, Kwon MJ, Shin YK, Nam SJ, Yang J-H, Kao J, Godwin AK, Pollack JR. LYN is a mediator of epithelial-mesenchymal transition and a target of dasatinib in breast cancer. *Cancer Res*. 2010; 70:2296–2306.
  65. Lien HC, Hsiao YH, Lin YS, Yao YT, Juan HF, Kuo WH, Hung M-C, Chang KJ, Hsieh FJ. Molecular signatures of metaplastic carcinoma of the breast by large-scale transcriptional profiling: identification of genes potentially related to epithelial-mesenchymal transition. *Oncogene*. 2007; 26:7859–7871.
  66. Taube JH, Herschkowitz JI, Komurov K, Zhou AY, Gupta S, Yang J, Hartwell K, Onder TT, Gupta PB, Evans KW, Hollier BG, Ram PT, Lander ES, et al. Core epithelial-to-mesenchymal transition interactome gene-expression signature is associated with claudin-low and metaplastic breast cancer subtypes. *Proc Natl Acad Sci USA*. 2010; 107:15449–15454.
  67. Zeisberg M, Neilson EG. Biomarkers for epithelial-mesenchymal transitions. *J Clin Invest*. 2009; 119:1429–1437.
  68. Bhatt AS, Erdjument-Bromage H, Tempst P, Craik CS, Moasser MM. Adhesion signaling by a novel mitotic substrate of src kinases. *Oncogene*. 2005; 24:5333–5343.

69. Bhatt AS, Welm A, Farady CJ, Vásquez M, Wilson K, Craik CS. Coordinate expression and functional profiling identify an extracellular proteolytic signaling pathway. *Proc Natl Acad Sci USA*. 2007; 104:5771–5776.
70. Fang J-D, Lee S-L. Matriptase is required for the active form of hepatocyte growth factor induced Met, focal adhesion kinase and protein kinase B activation on neural stem/progenitor cell motility. *Biochim Biophys Acta*. 2014; 1843:1285–1294.
71. Fang J-D, Chou H-C, Tung H-H, Huang P-Y, Lee S-L. Endogenous expression of matriptase in neural progenitor cells promotes cell migration and neuron differentiation. *J Biol Chem*. 2011; 286:5667–5679.
72. López-Otín C, Hunter T. The regulatory crosstalk between kinases and proteases in cancer. *Nat Rev Cancer*. 2010; 10:278–292.
73. Nava P, Kamekura R, Nusrat A. Cleavage of transmembrane junction proteins and their role in regulating epithelial homeostasis. *Tissue Barriers*. 2013; 1:e24783.
74. Netzel-Arnett S, Currie BM, Szabo R, Lin CY, Chen LM, Chai KX, Antalis TM, Bugge TH, List K. Evidence for a Matriptase-Prostasin Proteolytic Cascade Regulating Terminal Epidermal Differentiation. *J Biol Chem*. 2006; 281:32941–32945.
75. Rupp C, Scherzer M, Rudisch A, Unger C, Haslinger C, Schweifer N, Artaker M, Nivarthi H, Moriggl R, Hengstschläger M, Kerjaschki D, Sommergruber W, Dolznig H, et al. IGFBP7, a novel tumor stroma marker, with growth-promoting effects in colon cancer through a paracrine tumor-stroma interaction. *Oncogene*. 2015; 34:815–825.
76. Satomi S, Yamasaki Y, TSUZUKI S, Hitomi Y, Iwanaga T, FUSHIKI T. A Role for Membrane-Type Serine Protease (MT-SP1) in Intestinal Epithelial Turnover. *Biochem Biophys Res Co*. 2001; 287:995–1002.
77. Ustach CV, Huang W, Conley-LaComb MK, Lin CY, Che M, Abrams J, Kim HRC. A Novel Signaling Axis of Matriptase/PDGF-D/ -PDGFR in Human Prostate Cancer. *Cancer Res*. 2010; 70:9631–9640.
78. Vestentoft PS, Jelnes P, Andersen JB, Tran TAT, Jørgensen T, Rasmussen M, Bornholdt J, Grøvdal LM, Jensen CH, Vogel LK, Thorgeirsson SS, Bisgaard HC. Molecular constituents of the extracellular matrix in rat liver mounting a hepatic progenitor cell response for tissue repair. *Fibrogenesis Tissue Repair*. 2013; 6:21.
79. Yoshihara K, Shahmoradgoli M, Martínez E, Vegesna R, Kim H, Torres-Garcia W, Treviño V, Shen H, Laird PW, Levine DA, Carter SL, Getz G, Stemke-Hale K, et al. Inferring tumour purity and stromal and immune cell admixture from expression data. *Nature Commun*. 2013; 4:2612.
80. Ray SS, Ganivada A, Pal SK. A Granular Self-Organizing Map for Clustering and Gene Selection in Microarray Data. *IEEE Trans Neural Netw Learn Syst*. 2015.
